# Supplementary material
Source: publisher site journal article supplement (https://www.spandidos-publications.com/6541/downloadSupplementary)
Supplement: Supplementary file 1 [file downloadSupplementary]

## Sheet: cervical cancer Upregulated
Table SI. Significant differentially expressed genes in lung, liver, cervical and pancreatic cancer.
C1orf112
SEMA3F
DBNDD1
FKBP4
YBX2
TMEM132A
MAP3K9
BAIAP2L1
DBF4
GTF2IRD1
E2F2
CELSR3
PLEKHG6
NCAPD2
ANLN
BRCA1
DDX11
TACC3
ACP3
CCDC88C
CLCA4
DEF6
DEPDC1
TYMP
ARNTL2
IKZF2
CENPQ
UBA6
DEPDC1B
CDH1
DNAH5
SPDL1
RAB27B
TDP1
ADRB1
DSG2
EPN3
RFC2
ARHGEF5
RAD51
POLQ
THOC3
MPHOSPH9
FSTL4
PLEKHH1
RELT
IL17RB
NDC1
TARBP1
STYK1
POLD1
MTMR1
INTS13
LPAR2
ABCA7
MCM10
ERBB3
PACC1
COL17A1
ASPM
PRKCZ
FGFR3
PRR11
PITX1
HES2
PTPN3
ST6GALNAC2
OSBPL3
RAD18
TRIP13
SREBF1
MARK2
HMMR
NDE1
MCM2
TP63
LLGL2
GSDMB
MAP3K13
CDHR2
ENO1
ANO8
GTSE1
GRAMD4
CELSR1
MOCOS
WDR62
MCM6
UNG
SPAG5
TPD52
TRAF4
UBE2T
SMC1B
LAMP3
TP73
PAFAH1B3
KIF22
RBL1
NDC80
TCF7
PKP1
AACS
PALB2
GRHL2
IGSF9
MTIF2
ORC1
RAD54L
FAT2
L2HGDH
AURKA
SULT2B1
ALG6
DNMT3B
TPX2
TMEM40
OAS1
FXYD3
GMIP
BIRC5
RCOR1
DNAJB11
KIF4A
ORC6
TGM1
WDR76
CLSPN
NUP50
CDC45
GABRP
CDC6
MSH2
HOOK2
NUP188
BLNK
MYO3A
SRPK1
ITPR3
DSP
CDC7
SCD
FBXL19
PLA2G3
SH3BP1
SLC16A8
CENPM
SEPTIN3
TCF20
CHKB
MCM5
RANGAP1
ZBED4
POLE2
CDKN3
PLEK2
CEP128
MTHFD1
VRK1
PABPN1
PCK2
GSS
MMP9
GINS1
MYBL2
RAB5IF
PABPC1L
SALL4
PRELID3B
E2F1
FAM83D
LIPG
CSTF2
POLA1
NXT2
AMMECR1
CENPI
KLF5
ELMO3
HAS3
ESRP2
MAZ
CEP152
RHOV
OIP5
CA2
POP1
ESRP1
TNFRSF10A
MCM4
LHB
CKM
PPP1R13L
DOT1L
RNASEH2A
KLC3
AMH
ASF1B
TNNT1
EPHX3
CCNE1
ZFR2
MYH14
GRIN2D
LIG1
LSR
SIPA1L3
ABHD11
CASP2
PTPRZ1
TFR2
RPA3
EZH2
TRIM14
CORO2A
CA9
UBE2S
RAPGEFL1
PNPO
CDK5RAP3
DLX4
EFTUD2
SLC9A3R1
FOXN1
NMU
NEIL3
NSD2
NCAPG
UPK2
NECTIN1
NAA40
PITPNM1
EXPH5
IL23A
CYP27B1
TRPV4
FOXM1
RAD51AP1
OAS3
VDR
RFC5
NUP107
TIMELESS
NOP2
CDCA3
PTPN6
SRSF9
ULBP1
MCM3
CRYBG1
GMNN
PERP
TTK
PRSS16
CEP72
KIF20A
LMNB1
NUP155
MACROH2A1
EHHADH
SMC4
TBCCD1
PDCD10
PFKFB4
COL7A1
ECT2
C3orf52
ATP6V1A
PODXL2
ABCC5
EIF4G1
RTKN
GPD2
CENPA
GTF3C2
ITGB6
MOGS
PASK
SDC1
DHCR24
IVNS1ABP
TTF2
MYCL
SLC2A1
CDC20
DARS2
IRF6
RCAN3
STMN1
NEK2
RPS6KA1
CENPF
TXNDC12
CHRNB4
KIF14
MREG
MYB
VAMP8
DCLRE1B
TJP2
CPSF3
PTBP3
DYNC2I2
BSPRY
ONECUT2
ACYP1
BCL11A
HELLS
CENPL
MASTL
KIAA1217
PLS1
TMPO
NCAPH
CSTA
KIF18A
PILRB
GJB6
GPSM2
CCDC18
ZWINT
CIT
DDX39A
GUCY1B2
CENPK
CDK2
HOXC11
STIL
HJURP
KCNJ2
CKS2
KCNS1
ARHGAP40
POF1B
LYPD3
H2BC11
RREB1
HROB
PSD4
SH2D3A
MGME1
MCM8
FAM110A
XRCC3
BCL2L12
PRRG2
DLGAP5
RAB3IP
AUNIP
SYNGR3
PKMYT1
FBXL16
CHTF18
RIBC2
STRIP2
KNSTRN
CLN6
E2F8
PIMREG
PARP2
FOXA1
RHBDF2
SGO1
APOC1
GTPBP3
KLHDC7B
SAMD10
CEP85
RBBP8NL
ARHGEF16
SMPDL3B
HIP1R
DNMT1
ULBP2
GINS2
F12
HAUS8
KCNC3
TUBG1
PSMC3IP
DIAPH1
C1orf159
KREMEN2
TNS4
TOP2A
MCCC2
FAAP24
C19orf57
NUP210
ENOSF1
CLUH
FIGNL1
ANKEF1
PCNA
ALDH3B2
TESMIN
DPH2
NASP
PATJ
RFC3
SLF1
FAM83F
TTC9
ADAMDEC1
CCNB1
VAV3
PSRC1
CD101
TMEM106C
GRHL1
YARS1
CDCA8
HOOK1
CYP2J2
DSC2
DSG3
DSC3
ACRV1
PSAT1
OASL
BICDL1
PRRG4
TROAP
ESPL1
MAP7
NHSL1
MDM2
URB2
CKAP2
BORA
ABHD17C
BRIP1
ACTL6A
IL36RN
SMC2
NCBP1
CTSV
DSCC1
ARHGEF39
TFAP2A
LRRC1
HMGA1
TCF19
FHDC1
GGH
TRIM29
POU2F3
KIF23
KNL1
ITPKA
PAK6
DUOX1
SPTBN5
CLCA2
SELENOI
CENPO
DTNB
KIF11
CEP55
KIF20B
DNA2
BARD1
FASTKD1
ZGRF1
CENPE
ALG10
GAS2L3
TDG
FAM222A
LNX2
BRCA2
DIAPH3
STON2
EFCAB11
DUOXA1
SLC27A2
DNAJA4
PIF1
RHCG
FANCI
TICRR
ZNF710
TOM1L1
SSH2
CARD14
CBX8
ZNF750
CBX4
PMAIP1
GRB7
SAMD1
PRDM15
LMTK3
GEMIN7
CBLC
PADI3
ARHGEF19
PGD
CNKSR1
IL22RA1
PLK4
SYTL1
KIF2C
PTPRF
IGSF3
CELSR2
UCK2
NECTIN4
NUF2
HDGF
TUFT1
TARS2
DTL
INTS7
SMYD2
SUSD4
S100A8
S100A7
C1orf131
MAP3K21
PARP1
EML4
CHAC2
DQX1
CDCA7
CCDC150
ABCA12
FANCD2
CCNA2
N4BP3
TBC1D7
TRIM7
PRIM2
MMS22L
MTFR2
CDCA5
EPHA1
NCAPG2
RAB19
RGS20
GINS4
MAL2
FAM83A
GSDMC
NAPRT
CDKN2B
CDKN2A
NR6A1
MKI67
MTG1
KLHL35
SLX4IP
INCENP
PLCH2
CCDC15
CHEK1
DSN1
CABLES2
TBX6
ALDOA
LYPD1
CCT5
NCAPD3
QTRT2
TMEM45B
CENPU
AP1S3
SPC25
UHMK1
SUV39H2
MARVELD2
CENPH
BCL2L11
ADGRF1
ADGRF4
CYRIB
CERS3
TRIM11
CCSAP
GBP5
BUB3
CXADR
SLFN13
SKA1
USP43
EME1
MOV10
NUP205
SPAG17
ANKRD9
SH3RF2
FBXO43
RAB11FIP1
MAPK13
TBC1D31
ATAD2
PHKG2
SASS6
BUB1B
TMEM171
LRP8
CCNB2
GRHL3
FANCC
ABHD3
RNF207
RHBDL2
H2BC5
CDC25C
DNAH3
PFKFB1
F11R
MIS18A
GART
DONSON
LAD1
RUNX1
TUBBP5
CHAF1B
SIM2
ARHGAP27
ADPGK
HK2
ADGRG5
LYPD5
SLC37A1
C21orf58
ZDHHC12
COX6B2
MPZL3
NEK8
TLCD1
S100A1
FLAD1
RUSC1
NBEAL2
LY6K
TONSL
RECQL4
BDH1
FDXR
ZNF385A
RACGAP1
SYCE2
SPC24
ALOX15
WDR90
CCDC78
TEDC2
CCNF
PAQR4
AKR7A3
KIAA1522
HENMT1
C1orf74
FLVCR1
DENND2D
KIAA1841
CCDC138
FBXO41
SMC6
VSNL1
BNIPL
BOLA3
IVL
SPRR3
SPRR2D
S100A9
TGFA
NIPAL1
DCST2
INAVA
KRTCAP2
TMEM79
CIP2A
SGO2
NUAK2
PRKCI
AIM2
CDS1
GMPS
RBM47
TOPBP1
KIF15
CDCP1
CAMK2N2
LIPH
RFC4
RPL39L
SFMBT1
CDC25A
HSPA4L
MST1R
POC1A
PITX2
MAD2L1
ADGRV1
F2RL1
LEAP2
DCBLD1
PTTG1
RELL2
FABP5
CHMP4C
TMEM184A
RASEF
SHOC1
ZNF367
AQP3
GJB2
SKA3
DDIAS
LRR1
NUDT5
COMTD1
E2F7
LARGE2
SMCO2
GPT2
DEPDC4
SGPL1
CENPN
TMEM41B
MCM7
A2ML1
MMP10
STRCP1
CIAO2A
FAM111A
PCLAF
PLK1
NEMP1
PIP4K2C
C15orf48
MARS1
DOLPP1
TEPSIN
MYO5B
RRM1
PPP2R3B
CDT1
RSKR
DHRS13
TUBA1C
CYP2S1
SPINT2
CHAF1A
KIFC2
TRPV3
C19orf48
KRT80
EVPL
TK1
RAB26
SAC3D1
PBK
FAM83B
MFSD2A
RFWD3
REEP4
ATXN2L
FEN1
PLA2G4F
CXCL10
GPRIN1
SPRR1B
BNC1
CKAP2L
BUB1
LRRC45
FASN
RAC3
TMEM154
NIPA1
CDK1
KRT86
TMC7
ARL6IP1
IRX2
SIX2
ZNF296
CDCA4
CEL
KCNG3
NETO2
CDC42BPG
SHCBP1
ZNF440
ESCO2
KRT15
KRT13
RRM2
FRMD5
MTBP
C5orf34
GTPBP2
PPP1CA
RAD9A
OVOL1
ADCK5
CKS1B
SYT12
PPP1R14B
C11orf80
JUP
TIGD3
CBX2
FBXO45
EXO1
ATP2A2
ZWILCH
GCSAM
SLC26A9
IL20RB
SLC29A2
CNIH2
UBE2C
CCNE2
GRAMD2A
CCDC14
P2RY2
RMI2
KDF1
LINC01106
SFN
CREG2
CRYBG2
ACBD7
B3GNT4
B3GNT5
LMNB2
IRX5
TYMS
TYMSOS
NFATC2IP
POLE
EPS8L2
ACOT4
PIDD1
HASPIN
AC025171.1
AL162595.1
GRAMD1C
GEN1
CALML5
BEND3
RPP25
STX19
CPNE7
OPLAH
FOXE1
LGALS7B
RMI1
AURKB
RCC2
LBX2
ZBTB42
APOBEC3B
MROH1
NKPD1
ANKRD18A
RCC1
BHLHA15
H2BC4
S1PR5
SCRIB
FAM83H
ST20
GPR137C
DHTKD1
TMEM102
SOX2
FANCB
C6orf223
PHLDA2
GINS3
RTKN2
IDH2
OGFRP1
TMEM30B
TSEN54
SHMT2
FBXL6
PLCXD1
NXPH4
KPNA2
TSPAN10
RPS17
HCAR2
SLC25A10
RIPPLY3
GPR19
RABIF
EPHA10
GBP6
RIPK4
TRAIP
CHEK2
LIN9
IQGAP3
PRKX
TACSTD2
ZDHHC23
PKP3
KNTC1
LPAR5
XPOT
CDCA2
USP18
BRI3BP
SEMA4B
ANO9
CCDC137
C12orf56
TEDC1
KRT6B
PARPBP
BRCC3
LMNTD2
KRT5
CYP4Z1
KIF18B
SAPCD2
EDARADD
SOWAHB
MST1P2
CYP4F3
HPDL
KIF24
CARMIL3
KRT16
KRT14
ERCC6L
FAM183A
ESPN
TMPRSS11A
SHTN1
HSPA14
SIRT7
PLEKHN1
TET3
ISG15
FANCA
FANCM
AC091057.1
KLHL17
NWD1
WNT7B
MESP2
C6orf132
AGRN
TUBB4B
RUFY4
SBK1
PRR19
H2AX
C19orf54
FAM83G
NDOR1
FAM72B
SLX4
GJB3
FAM111B
CLDN4
JPT1
GJB5
S100A14
ALG1L
RASSF10
GJB4
SYCP2
PAX5
CCDC189
PLEKHG4
SEMA4A
RYR1
ATP2A1
STK31
C9orf163
THEM5
SPTSSB
FAM72A
MYO6
MMP1
ERI2
S100A2
H2AC11
H2BU1
LAGE3
LRRC8B
CYSRT1
RAD54B
ZNF165
BLM
HNRNPAB
ZNF695
CDC42SE1
SERPINB2
SERPINB13
OCLN
SLC22A20P
GOLGA6L9
PRIM1
AKR1B10
NUP62CL
WDHD1
PPP1R14C
PAX9
ARHGAP11A
PRC1
DCLRE1A
IQANK1
H2BC18
ZYG11A
GPRIN2
LY6G6C
PSORS1C2
DDR1
RANBP17
MROH6
ARHGEF34P
SPIRE2
LGALS7
ADGRG1
KRT6A
KRT81
CALML3-AS1
CPT1B
HMGN1
CYP2D7
DENND1C
JPT2
SERPINB4
SERPINB5
MIR25
DENND1B
TRIM59
ARHGEF35
MXD3
FIRRE
DNAJC9
LTB4R
LTB4R2
IRF9
AP1G2
ALG3
CAPN14
DDX12P
LINC01588
AATBC
TNFRSF25
TSTD1
FANCG
HMSD
SLC12A8
C10orf55
CKMT1A
TINCR
C5orf66
LINC00885
AL590617.2
MKRN2OS
C2CD4D
MIAT
AC084809.1
SRRM5
ERVMER34-1
AKR1B15
SOX21-AS1
GEMIN8P4
DHFR
NAMPTP1
TPI1P2
AC021078.1
FOXD3-AS1
AC005077.4
MIR205HG
LINC02541
AC112484.1
DLEU2
DARS-AS1
EP300-AS1
TNF
DUX4L50
AC008105.1
RPSAP69
TMEM238
AP000695.2
AC073529.1
C2CD4D-AS1
LINC01814
ASMTL-AS1
AL445231.1
KDM4A-AS1
AL358115.1
FAM157A
LINC00106
AC245052.4
CKMT1B
FOXD2-AS1
NONOP2
KIFC1
DGUOK-AS1
GOLGA2P5
NCK1-DT
ALKBH6
TCAM1P
CDKN2B-AS1
CDRT1
ARHGAP8
AC069499.1
MTFP1
EFNA4
NME2
CRNDE
AC100861.1
PGAM5
UBL7-AS1
MTND4P12
AC008771.1
HOXC-AS2
GAPDHP35
LINC02236
AC092611.1
FOXD1
CA3-AS1
PRKDC
LMNTD2-AS1
DPP3
AC084125.2
HCAR3
AC100858.2
MIR9-3HG
GOLGA2P10
CAPNS2
TMPO-AS1
SCAT2
AC004816.1
AC015660.1
UBE2Q2P2
AC027601.1
AC107871.1
AC124944.2
AL023284.4
ATP2A1-AS1
AC109460.2
LINC01572
AC092718.4
AL031058.1
VPS9D1-AS1
AC108860.2
TBILA
AC009065.8
H2BC20P
AC027228.2
AC007342.4
MMP12
AC080037.2
ANXA8L1
AC010761.1
ANXA8
RPL17
ZNF488
MAP3K14-AS1
MIR924HG
CIRBP-AS1
AC002116.2
AC087289.5
CCDC177
GABRQ
AC137932.3
AC104534.1
AC008760.1
AC016773.1
AL353622.1
AC026740.1
AC012073.1
AL390719.2
AL024508.1
AL451050.2
AL365181.3
AL021807.1
AC019069.1
AC103702.2
LINC02012
DGCR5
AL133215.2
AL355488.1
H2BC8
PCCA-DT
PRAG1
CCL18
AL121832.3
UHRF1
AL390719.3
AL157829.1
AL135905.2
AC008966.3
AC244102.3
RCAN3AS
AC010092.1
BX842570.1
AL499602.1
AC137695.3
AC024560.4
AL691432.4
AC009501.2
AC092745.4
AL135818.3
AC010641.2
AP006545.3
AL136419.3
AC108066.2
AC010996.1
AL590101.1
AC121757.2
AC124248.2
AL513218.2
H3C3
AC018695.9
AL592211.2
AC073593.2
AC108477.2
AL096840.2
AL732437.3
AC122719.3
AC108479.1
Z99127.3
AC061975.8
AL139423.2
AP001885.2
AC073548.2
AP001885.3
AC137894.4
AC092720.3
NPBWR1
AC024884.2
AC131159.1
H2AC14
AL136221.1
AL109614.1
MIR7111
AL158196.1
H4C4
H2BC7
AC007546.1
AC008406.3
RDM1
AC138393.3
AC068831.5
AC141557.2
AC117503.2
AC145207.9
AP003068.4
AC130686.1
AL031602.1
AC091060.1
AL031009.1
LINC01451
AL133373.3
PRAL
AL031123.3
AC005261.5
AP000437.1
LINC00216
AC007342.8
AC023024.2
AC116407.3
CU639417.5
AC131212.4
AC006330.1
AC084876.2
AL356481.3
AP001052.1
IGHV7-4-1
AC119427.1
AC093591.3
LINC02635
AL132857.1
AL592295.3
FAM95C
SCO2
MIR205
AP000553.5
AP000553.6
AP000553.7
AL033527.3
AL358472.5
AP000812.4
AC103718.1
AC023593.1
AL357079.2
PAX6
TFAP2B
GABRA3
ZIC2
ROS1
OVOL3
ATP1A3
SYNGR4
KLF1
UPK1A
LHX2
DNTT
PKD2L1
AADAC
TLX2
OTX1
KISS1R
ATP6V1B1
TNNT2
VSX2
HOXB1
TP53AIP1
ABCC11
HOXC13
GCNT7
IL9R
H1-3
OR2B6
SOX21
SRMS
FAM83C
SLURP1
GNGT1
FEZF1
HOXD1
ELL3
BBOX1
MNX1
DUSP9
SLC34A1
RTBDN
GUCY2D
RHBG
DSG1
ELF5
KRT87P
EMX1
ZNF670-ZNF695
IGF2BP3
CASP5
SIX3
GPR87
ZIC5
TTC6
IGLON5
DMRTA2
GPA33
DLX1
MYH15
TM4SF19
SLC10A4
SPINK7
MAGEA4
ATP6V0D2
INA
TLCD3B
POU4F1
CLCA3P
RAET1L
PLA2G2F
HOXB13
IGF2BP1
CLDN14
PLA2G4D
TGM7
PGLYRP3
ISL2
FOXH1
KASH5
FGF11
HS3ST6
NTN3
LEXM
TDRD5
C1orf147
TSACC
PLSCR2
CAMP
FBXW12
CAGE1
TERT
ADGRF2
TLX3
DCSTAMP
RAPSN
TBATA
HTR3A
LDHC
LAIR2
NLRP7
MAJIN
GBX2
ONECUT1
FABP6
FRMPD2
KRT78
KRT74
SLC26A5
LILRP2
PLAC1
LRRC8E
NMRAL2P
WDR87
MAB21L3
DMRT2
CBY2
WDR49
PCP2
WFDC5
CCDC168
TMEM270
RPP38-DT
GRIN1
AP000679.1
UMODL1
NHLH2
GK4P
CALML3
C5orf46
AC020907.1
ALOX12B
CCR8
LINC02870
ADGRD2
ZBTB12BP
OFCC1
DDN
EPGN
GALR2
AC131971.1
S100A7A
H1-5
SPATA32
POU3F2
GAST
MROH2A
H2BC13
KPNA7
KRT79
DLEU7
NBPF6
RGS9BP
KRT3
KLK12
CCDC73
KRT17P2
C1QL4
ZACN
ATP13A5
AMTN
C17orf99
PLA2G4E
IDO2
HMX2
KLRG2
RNF222
ANKRD34B
SLC30A10
H2AC13
H3C12
MAGEA6
CYP2B6
DMBX1
AL157838.1
TMPRSS11F
MAGEA1
SPOUT1
MIR429
MIR210
SNORD14E
SNORD46
LINC00862
SPRN
ADAMTSL4-AS1
CT83
LINC02783
PKP4-AS1
ASPDH
SMPD5
FAM83A-AS1
SPDYE2
MT1H
LINC00634
AC108134.1
ONECUT3
SERPINB11
AC007240.1
SNORD101
AP000577.1
RNU6-140P
MIR200A
AP000553.1
SNORD83A
TRBV28
KRT18P10
AC004980.2
LINC01913
KRT16P3
KRT16P1
LINC00243
GCGR
FAM72D
IFI30
CKLF
RAET1K
SNORA11F
GAS8-AS1
MAGEA3
MYBPHL
SNORD19C
AL590666.1
LINC02068
SMPD4P1
AC073136.1
LGALS8-AS1
BCAR3-AS1
UBE2SP2
AL391427.1
AL117329.1
FAM96AP2
TNK2-AS1
PLA2G12AP1
AC010789.1
CDKN2A-DT
AL645608.1
AL512363.1
AC012485.1
AL603832.1
LINC00337
LINC00618
AP001628.1
SNX18P3
LINC01671
RPS15AP10
SP3P
LINC02036
AC245100.2
AC023590.1
CTAGE4
LGALS17A
CYP4F26P
AC021028.1
GTF2IP7
Z98257.1
AL161725.1
KRT16P2
DLG1-AS1
HPN-AS1
RPL39P16
Z94721.1
AL358075.2
AC024937.1
AL359918.1
NECTIN4-AS1
SPRR2C
RUNX3-AS1
NKX1-2
AL139421.1
AC004975.2
UBE2Q1-AS1
TFAP2A-AS1
AL022316.1
AL358781.2
FEZF1-AS1
EXOSC10-AS1
ANKRD18B
AL445933.1
AC140479.2
AC005532.1
LNCAROD
LINC01305
AL354993.1
MTHFD1P1
AL031848.1
KRT17P3
GRHL3-AS1
VIPR1-AS1
AC211433.1
AC097717.1
PTGES2-AS1
AC000078.1
AC243772.2
ERVH48-1
LINC01762
DHCR24-DT
MROH3P
AC133785.1
ERP29P1
PDXP-DT
KRT8P39
AC092814.2
LINC01136
MCIDAS
C11orf94
AL139128.1
GTF3C2-AS1
AC016745.1
AC068580.3
MNX1-AS2
AL035456.1
LINC02532
AC009495.3
FAM83C-AS1
AC074117.2
RPL12P25
SNORA71B
DBF4P1
G3BP1P1
AC009299.2
AP001625.2
AL354766.2
AC009262.1
EEF1E1P1
SCAT8
LINC00479
PKMP1
LINC02195
AC107081.1
KRT18P5
CTAGE9
GAPDHP2
AP003774.2
FABP5P1
PRMT5-AS1
AP000251.1
DYRK3-AS1
KCNMB2-AS1
RN7SL333P
RN7SL608P
LNCSRLR
SLC25A24P1
AL627309.5
AC093904.2
RBBP4P2
STRC
PSG4
MNX1-AS1
JMJD7
AC091153.3
CTAGE8
AC004918.1
GS1-24F4.2
AC024588.1
AC138904.1
AC006064.2
INSL3
AC074194.1
AC114956.1
FLJ12825
PRR5-ARHGAP8
HMGA1P2
KRT8P46
C5orf66-AS1
LINC01411
HOXC13-AS
LINC00964
AC025176.1
RDH10-AS1
LINC01618
KLHL2P1
SLC2A9-AS1
AC098869.2
TRIM7-AS1
AC138956.1
AC005324.2
BRCC3P1
AC105339.2
RNU6-762P
WASHC5-AS1
AP001574.1
AC083973.1
LINC02159
AC012213.1
LINC01151
HMGN1P38
MAL2-AS1
CTB-178M22.2
AC103957.2
AC022973.5
CHKB-CPT1B
AC105219.1
AC080023.1
BBOX1-AS1
RASSF10-DT
AC105219.3
AC067930.4
OVOL1-AS1
CARD17
WTAPP1
AC023790.2
C10orf88B
AC009533.2
AC007848.1
LINC00944
AC006206.2
AC112777.1
AP001160.1
PPP1R14B-AS1
AC121757.1
LINC02156
DDN-AS1
AC125611.2
AC144548.1
LINC00592
AC078778.1
PCNPP1
RCCD1-AS1
AL157871.2
AL583810.1
BCL2L2-PABPN1
HSPE1P2
AL079303.1
LINC01269
AL357093.2
LINC00520
LINC02321
AL157871.5
TUBB3
SALRNA1
AL049869.2
LINC02345
AC013652.1
AC025580.2
LINC01833
PIGHP1
AC106738.1
HERC2P10
AC106820.2
AC138028.4
AC093249.2
TPSP2
AC019294.2
KCNJ18
FAM157C
AC023043.1
AC011374.1
AC009097.2
AL445531.1
AC120498.4
ADPGK-AS1
AC244034.2
AC093904.4
ATP2C2-AS1
TUBB8
AC020978.4
AC013391.3
LINC02582
TCF24
AL033527.2
AC004706.1
LINC00514
AC004034.1
TXNP4
AC087222.1
AC009121.2
LINC01977
TMPOP2
AC124319.1
AC009171.2
AC007216.4
AC003965.2
FAM72C
MSMB
AP005230.1
AC022211.1
AP005899.1
AP000845.1
AC100778.2
RN7SL381P
AC016866.1
AC024267.3
MIR4653
DPRXP4
AC016876.2
DSG2-AS1
SH3GL1P2
AC010761.4
MIR4664
LINC01970
AC022211.3
MIR4477B
AL449423.1
AC005336.1
AC008735.1
SCAT1
AC011476.2
ERVE-1
AC003070.1
AP005264.4
AC008763.1
LINC02560
ESPNP
AC010624.3
AC092301.1
CYP4F23P
AC011466.3
CCDC194
CCNYL6
RNF225
AC068790.3
AL353593.2
AL513327.2
AC025766.1
AL591806.2
AC104819.3
AC106900.1
H4C14
AC015849.5
LRRC37A9P
AL033384.2
AC004890.3
AC011337.1
AC012213.4
AC073195.1
U47924.1
AL512413.1
AC005041.3
AC097358.2
AL662797.1
AC073352.1
KLHDC7B-DT
AL133551.1
AL356299.2
AP001412.1
AP000553.2
AC002059.1
AL645608.8
H4C12
AC022558.3
AC245041.1
AC020658.4
AL096828.3
H3C8
AC007014.2
ALOX15P1
AC073575.2
AC069281.2
AL121845.4
H2BC17
AL023803.2
AC020663.3
AL121906.2
AC018695.6
AL049539.1
H2BC9
AC021491.4
AC004263.1
AC092118.2
ZC3H11A
ARSF
CNGB1
ABCB11
AQP6
DLL3
KRT31
EFNA2
TOP3B
MIOX
PAX7
SPRR2F
PRSS3
SLC6A7
ATP12A
OPRK1
LHX5
FETUB
KCNA7
IL12B
IRX4
TBX4
FIBCD1
TEX101
NKX2-8
PDX1
HORMAD1
HAPLN1
CPA5
SSTR5
CSF2
NGB
LGALS9B
KRT83
SOX11
SPINK6
C10orf67
HS3ST4
TMEM105
TMPRSS11B
FOXE3
SPRR2B
H4C3
H4C11
BPIFA1
LINC02026
AC010168.1
AC129492.1
SP9
U82695.1
CYP4A22-AS1
AC008013.1
PSMD10P2
IL9RP3
AC099066.2
MYL12BP2
SNRPGP9
RGS17P1
AL356234.2
LINC02043
SLCO4A1-AS1
DEPDC1-AS1
KRT18P63
AC007405.2
PTCSC2
LINC00707
AC117394.2
AL357153.1
PLA2G4E-AS1
CSTF3-DT
KRT8P48
TMPRSS11BNL
AP003469.2
AL355102.4
AL121790.2
ZHX1-C8orf76
AC026470.2
AL137782.1
SEPTIN9-DT
AC079336.2
MIR2117HG
AL136172.1
AL451085.1
AL031710.2
H2AC16
AC140479.5
AC013268.4
AL049637.1
H3C2
AC005865.2
AC079804.3
AL391560.2

## Sheet: cervical cancer Downregulated
TNMD
MEOX1
THSD7A
SOX8
CACNA1G
GAS7
CD79B
REV3L
IFFO1
RNF216
DCN
CLDN11
ZMYND11
IGF1
ATP1A2
ZNF582
HGF
ADGRA2
SAMD4A
FHL1
HSD17B6
VIM
MYOC
VCL
TIMP2
TLL1
RIPOR1
EPHA3
PREX2
ARHGAP6
LMO3
CELF2
PTGER3
ALX4
METTL24
NRIP2
CHRDL2
PPP1R12A
ATP2B4
PSD
EIF4B
CA11
CCN5
GLP2R
MYLK
TBC1D1
TIE1
ISOC1
PLPP1
SYT1
NAV3
PDZD4
HYAL2
HDAC4
INPP5A
RASGRP2
PYGM
ABCC9
MAOB
TGFBR3
FGF10
FSTL3
CAMK2A
LMCD1
CYBRD1
LIMS2
SPEG
IRAG1
SMARCE1
FERMT2
SCARF1
WSCD2
CTTNBP2
PPP1R12B
ACTN2
NAALAD2
FGFR1
ADCY2
ADCYAP1R1
ITM2A
RUNX1T1
FKBP7
TNS1
MOXD1
IGSF9B
MEF2C
PCDHGA2
PGR
TRPM3
ABCB1
EPDR1
ADD1
REM1
C3orf18
HEPH
LTBP4
MAP3K20
ESR1
CD200
CCDC80
JPH4
SORBS1
CREM
ABL1
CIRBP
GADD45B
SERPIND1
GGT5
LGALS1
TIMP3
CYB5R3
CBX7
RPL3
RBFOX2
CTSG
CDKL1
SLC8A3
SEL1L2
ANGPT4
CCM2L
MYL9
TBL1X
CHRDL1
PAGE4
SRPX
BMX
ZC3H12B
PHEX
CD99L2
KLHL4
DRP2
FGF14
MEDAG
TSC22D1
NECAB2
CRISPLD2
FOXF1
FBXO31
SALL1
CDIPT
RASL12
DTWD1
CPQ
R3HCC1
PPP2CB
NOVA2
SNAPC2
SYDE1
PRX
CLIP3
NOP53
MEIS3
GRIK5
RUNDC3B
RASA4
CAV1
CPED1
HIBADH
PCOLCE
MEOX2
RARRES2
TMEM245
PRUNE2
OGN
ASPN
ECM2
AKNA
RAB11FIP2
CXCL12
PPP3CB
CCSER2
ACTA2
LGI1
ASPA
P2RX1
ICAM2
EZH1
SGCA
RCVRN
PMP22
RPL34
BST1
ZBTB16
NRXN2
HIPK3
CD81
VWF
KCTD10
LIN7A
ACSS3
TNS2
CREBL2
ART4
MGP
RERGL
ADGRD1
SERINC1
RIPOR2
RBM24
BAG2
RAB23
FHL5
PACRG
SMOC2
LAMA4
PCDHB2
C7
PCDHB5
PDE8B
PCDHB15
RASGRF2
TXNDC15
GNAI2
EIF1B
ZBTB47
FNDC4
PDE1A
TACR1
IGFBP5
PLCL1
PLEKHA3
PRRX1
PAPPA2
ANGPTL1
RPL22
MEF2D
LEPR
RGS2
OLFML3
KCNQ4
AKT3
KIF17
MPL
CCDC181
IFT46
NRP2
TCF21
CASQ2
PKD2
ABCG2
CCNI
PCDH17
CCND2
KLF9
ECRG4
CCDC92
CNRIP1
MXI1
CFAP58
TEK
GRIA2
MYCT1
SMAD9
GLT8D2
CLU
ADRA1A
SPOP
FAM117A
KCNJ8
PDZRN3
POPDC2
CRY2
FABP3
CPXM2
RASL11A
UBL3
XPNPEP2
RPL5
PTGFR
SEPTIN7
RECK
PHF24
CALD1
NECAB1
ADGRE5
ITIH5
MMP19
PDE1B
MORF4L2
SNX21
GDAP1L1
PTGIS
NDP
PTGER2
PPP1R12C
CD93
DSTN
F10
THRA
RRAS
RHOJ
AVPR2
ARMCX1
TMEM35A
ZC4H2
OMD
MASP1
KLF2
IL17B
ZNF835
GNG11
KDR
MCHR1
FLNC
ALDH1A2
PALLD
ATP1B2
ADCY4
CDO1
PRRG3
STARD8
CNN1
GADD45G
LRCH2
DPP6
USHBP1
SNX9
STK33
JUND
HRC
HABP4
RGN
SYNE1
HIGD1B
SH3BGRL
RFTN1
GALNT15
LRRC4B
AOC3
RAMP2
TMEM204
RAI2
EMILIN2
RAMP1
SERPINF1
RGS22
MATN2
HSPA12B
SYT11
MTUS2
MPRIP
DCLK1
TRPC4
STARD13
TCEAL4
MYH11
GIMAP6
LYVE1
SARAF
RNF122
DUSP26
CAMK1
MEIS2
TSPAN2
GSTM5
SOX5
RERG
RTL8C
DTNA
PDGFRA
ADAMTS8
ITGA7
HTR2B
ARMC9
ISCU
LRCH1
EDNRB
GYPC
TMOD1
TLR4
GARNL3
ENPP2
IL11RA
TLN1
DNAJB5
ALDH1B1
MGARP
LRRC32
PI15
FXYD6
THBS1
ITGA11
CYP1B1
EMILIN1
CALHM2
ENTPD1
CILP
FGF2
MMRN1
TRPC3
ENPEP
SHISAL1
PRICKLE1
RBP5
PIANP
GLIPR1
ACVRL1
NOVA1
FBLN5
FGF7
TPM1
NTRK3
MFGE8
TGFB1I1
MAP1LC3B
MYOCD
ABCA8
OSBPL1A
GATA6
IGFBP4
COL6A1
COL6A2
EMP3
ADAMTS10
RERE
SYPL2
RXRG
TBX19
DPT
CTSK
ATP8B2
KCNN3
ITPKB
GDF7
AFF3
POMGNT2
ITGA9
IL17RD
LPP
SLIT2
ANK2
CRHBP
ADAMTS19
KCNMB1
RSPO3
GNA12
IGFBP3
DENND2A
TMEM47
DIPK2B
ITGB1BP2
TACC1
GSN
HMCN2
ZEB1
SERPING1
CCDC81
NCAM1
ADAM33
ESAM
TAGLN
JPH2
KIAA1755
CLEC1A
CTF1
ARID5B
GPM6A
WDR17
DIXDC1
FOXO1
RILPL2
ITPR1
DCP1B
CACNA1C
NPAS3
FAM160B1
RNF144A
FLI1
SERP2
ZNF385D
GFRA1
KCNE4
ARL14EP
GUCY1A2
NMT2
SPARCL1
DAB2
RASSF3
PTPRD
JAZF1
PID1
LGI4
ROBO4
ABI3BP
CEP112
ABCA9
ABCA6
ABCA10
PGM5
DIPK1A
PDLIM3
JAM2
ADAMTS1
ADAMTS5
PIEZO2
CYP2U1
PIP4P2
FMN2
SAXO1
RRAGA
MICU3
KCNMA1
EEF1A1
ST3GAL2
TSC22D3
TSPAN18
PALM2AKAP2
COLEC12
GPRASP2
CSRP1
STARD9
FAM131B
ZYX
ZBTB8A
ZNF208
PLPP7
PTH1R
MYL3
COX7A1
CD300LG
TAMALIN
BCL6B
ITIH3
SLC1A7
CZIB
PLPP3
SLC45A1
SDC3
SYNC
NEXN
ADGRL4
AKNAD1
CADM3
DDR2
SNED1
RFTN2
FRZB
ACTG2
NOSTRIN
C1QTNF7
ANTXR2
ABRAXAS1
PBXIP1
COL6A3
LMOD1
IGFBP7
CCDC141
TGFBR2
PRICKLE2
ADAMTS9
PPM1K
PTX3
SLMAP
RPL9
PCOLCE2
GYG1
TCF23
CLEC3B
HEYL
EMCN
C4orf3
SCRG1
GASK1B
NPY1R
EBF1
TXLNB
CREBRF
TMEM200A
PI16
MYOZ3
GPR85
CAMLG
BMPER
OSGIN2
GPR146
OSR2
GEM
CCDC171
NIPSNAP3B
NFIL3
MAMDC2
SVEP1
VEGFD
SLC7A3
LRFN5
MARCHF8
CFL2
ZCCHC24
DEPP1
VSTM4
JCAD
SLC39A13
PDZRN4
CACNB2
JAM3
CMTM5
RAB8B
AVPR1A
CLMP
CYYR1
WBP1L
BORCS7
APBB1
TUB
MFAP4
BMERB1
YPEL4
TERF2IP
GPR182
MAP1A
RBFOX3
PPP1R14A
PLIN4
SPRYD3
IGFBP6
TMEM88
RAB3IL1
BEST1
ULK4
NAALADL1
SCARA5
RBPJ
PXK
ACOX2
FILIP1L
TNXB
PHYHIP
CAVIN2
AXIN2
PKIG
ATOH8
AR
FAM110B
CA5B
KCNAB1
CLIC4
ZEB2
LDB2
ZFPM2
RNF150
ADPRM
FAXDC2
CRTAP
SETMAR
DNAJC18
TMEM43
CYTL1
CAVIN3
S1PR1
FEZ2
GIMAP8
NPTX1
PDE7B
MAP6
BCL2
PRND
ADRA1D
C1QTNF4
NEGR1
CSDC2
RCAN2
SYNPO2
RSPH9
TCEAL1
EFEMP2
PURG
MRGPRF
BNC2
ADCY5
ABCD2
ZNF483
MMRN2
IHO1
HSPB7
STAT5B
CD34
CTSF
MSRB3
SELP
ZHX3
PODN
ABRA
ZCCHC12
PELI3
B4GAT1
PABPC5
RPL15
CD248
ZDHHC14
DES
GAL3ST3
ZNF25
C11orf68
A2M
JAKMIP2
ZNF404
ZNF135
EID2B
CLEC14A
DIRAS1
GNG7
ZNF843
SCN4B
ANO6
FAM9B
LRRN4CL
HIC1
CAVIN1
RPRM
ADAMTSL1
ZNF366
KCTD12
APOLD1
GIMAP7
C14orf28
ACTA2-AS1
PLD5
MTURN
GAS1
GREM2
GPR135
SLC2A4
AP1S2
KBTBD3
MXRA7
NXPH3
NDN
IGIP
TCEAL7
SLC8A1
BEGAIN
TMEM119
WT1-AS
CCBE1
FHL3
TRIM61
TNFAIP8L3
FBXL7
ZNF438
LHFPL6
CBX6
OLFML1
SMTN
ST6GALNAC3
CLDN5
ADRA2C
TSPYL2
OAF
SLIT3
TMEM255B
PRR16
RBM43
TCEAL2
WT1
KLHL33
PRKN
PRKG1
SRL
SLC51B
NAP1L3
NAP1L2
PDE2A
KANK3
MITF
FNBP1
MAGI2
C11orf96
MAGEH1
PEAR1
LDLRAD2
COL14A1
C11orf95
ZNF626
PRKAR1B
ZNF559
SERPINA5
C22orf34
CC2D2B
PARVB
PRELP
LRRK2
PLAC9
NKAPL
PCDH18
ALKAL2
FAM180A
GSPT2
ZNF676
FAT4
ACADSB
GREB1
ZNF471
ZNF34
ZNF781
TCEAL3
CACNA1H
ADH1B
ARID5A
PDLIM7
FLNA
SMIM10L2B
ANXA6
ZNF300P1
FAM110D
KANK2
ZNF98
FBXL22
DACT3
ADARB1
DIO3
MFAP5
DPP4
PARVA
KLHDC1
SGTB
NKIRAS1
ZNF677
ZNF667
PEG3
TPM2
PLN
CCDC69
ZNF521
ZNF358
SELENOM
RYR3
ARHGEF15
CES1
RUSC2
MAP3K3
GPRASP1
ZFP2
PJA2
TMEM273
LINC02731
FAM155A
TMEM240
RP9P
LOH12CR2
ACKR1
GIMAP1
NOC2LP1
LEPROT
RPL21P75
ITGA1
TSPAN4
MEG3
ZNF727
VAMP2
ZNF880
AC005165.1
TSSC2
EPB41L4A-AS1
CCNT2-AS1
HSD52
AC121247.1
CADM3-AS1
PTPRD-AS1
TSBP1-AS1
AC092802.1
AL583785.1
AC005682.1
TEX41
AC018647.1
AP001324.1
AC239809.3
MBNL1-AS1
EMX2OS
AL139220.2
AC002451.1
LINC02884
LINC02613
DIRC3
LRRC8C-DT
AL691447.2
RAP2C-AS1
LINC02802
AC093673.1
CYP1B1-AS1
LINC00702
EEF1A1P6
AC004947.1
MAGI2-AS3
NEXN-AS1
LINC01936
HAND2-AS1
LINC01358
RPL9P7
TNFSF12
AQP1
ARHGEF25
ADAMTS9-AS1
CD302
INMT
ADAMTS9-AS2
PLEKHO2
C22orf39
AC005062.1
STON1
AC107959.1
A2M-AS1
AC008393.1
LINC02447
DACT3-AS1
LINC02202
PPM1K-DT
SOCS2-AS1
TRIM52-AS1
LINC01197
AC010226.1
ADAMTS19-AS1
CARMN
ECSCR
TMEM158
AC004803.1
LINC00923
SHANK3
PCDHGA12
TMEM200B
PCDHGB6
AC090197.1
PCDHGA11
AC100810.1
AC091563.1
LINC02696
MAGEL2
AP000662.1
SENCR
AP005018.2
LINC02739
EID1
Z97989.1
AP001528.1
AC145124.1
POLR2M
PABPC1P4
CCND2-AS1
HADHAP2
RPL41P2
AP002761.3
NHLRC4
AC027288.3
AL121821.2
LINC01579
AL162171.1
LINC00639
LINC00924
AC087477.2
AC090825.1
AC243562.2
AL049838.1
FRRS1L
AC095057.3
AC007541.1
AC132872.1
AC126773.4
SNAI3-AS1
AP000766.1
AC009166.1
PECAM1
AC096921.2
PAN3-AS1
AP003071.4
SPON1
MYZAP
LINC00672
GATA6-AS1
LINC00683
LINC01532
ILF3-DT
LINC01140
TBX2-AS1
ZNF582-AS1
S1PR2
AC007998.3
CLEC4GP1
AC027307.3
AC024075.2
ZNF728
AL009178.2
LIX1L
MAN2A1-DT
FGF14-AS2
AC067838.1
AC107952.2
AC092354.2
AL357054.4
AC067750.1
AC135803.1
AC005070.3
AC011472.4
AC092140.2
AC080038.1
CCL23
AC048382.5
AL022345.4
AC092376.3
AC093849.2
AC108053.1
AC097382.3
AC009951.6
AC007877.1
AL139351.3
AP003071.5
PRLHR
SLITRK3
NUDT10
DACH2
MAS1
SAG
LEFTY2
CLVS2
SCN2B
TRIM63
HIPK4
NTNG1
HAND2
NPY5R
RSPO1
HSPB3
SYT9
ANGPTL7
KLF17
GPR22
MYOZ2
HPSE2
KLHL38
TMEM132C
KCNA4
OPCML
KCTD8
DRD1
LCN10
ADRB3
GRM7
FAM180B
TCEAL5
TCEAL6
CASP12
AC112715.1
PGM5-AS1
PGM5P4
AL109741.1
LAMA4-AS1
AL158055.1
AC073636.1
AL133346.1
AL590226.1
SLC47A1P1
AC092667.1
AC092162.2
LINC02599
JAZF1-AS1
AC053503.3
AL139339.1
BNC2-AS1
AC131097.3
AL021408.1
AC074286.1
LINC01563
LINC00844
LINC01352
C1QTNF9
ERVFRD-1
MEF2C-AS1
AC114284.1
LINC01016
AC092490.1
AC107208.1
LINC02754
AC104211.1
KCNIP1-OT1
AC013643.2
AP001107.5
AC009806.1
MRGPRF-AS1
AP001363.2
AC012085.2
FRMD6-AS2
LINC02310
SETP2
AC025431.1
SERTM2
DKFZP434A062
MIR133A1HG
FXYD1
AC005746.2
LCN6
AC005180.1
AC005180.2
CYP4F24P
LINC02078
AC011503.1
AL031429.2
AL139022.2
AL445423.1
AC027449.1
CCL16
AL513166.1
AL356495.1
AC140118.2

## Sheet: liver cancer upregulated
SEMA3F
DBNDD1
ARHGAP33
ZMYND10
ABCB5
HOXA11
MEOX1
REXO5
CRLF1
TMEM98
TMEM132A
MAP3K9
ALDH3B1
CCL26
DBF4
SCIN
KIAA0100
SCN4A
E2F2
ADAM22
CELSR3
IL32
MAPK8IP2
NCAPD2
DPF1
ANLN
GABRA3
SEMA3B
DDX11
TACC3
POLA2
ZC3H3
MTMR11
SNAI2
SLC45A4
GRAMD1B
EHD2
DEPDC1
TYMP
RTEL1-TNFRSF6B
AGPAT4
BTN3A1
IBSP
BAK1
CENPQ
TMSB10
DEPDC1B
DAPK2
HOXC8
SPDL1
AIFM2
CAPG
ZIC2
CUL7
MAGEC2
ANO2
KITLG
ADAMTS6
TNFRSF9
NFE2L3
HOMER3
RAD51
POLQ
FSTL4
MCF2L2
LAMA3
PHPT1
ENTPD2
PLEKHH1
NPFFR2
MSH4
RASGRF1
UNKL
TARBP1
COL11A1
BCAT1
LZTS1
SPAG4
POLD1
SPA17
RFXANK
CTSA
ABCA7
SNCAIP
BCAS1
MCM10
PACC1
ME1
CTNNA2
ASPM
MPPED2
CLDN18
CACNB1
PKM
NAV3
ACSL4
PRR11
IFT80
PITX1
HES2
ATP1B3
CLTCL1
FSTL3
PABPC1
TCOF1
OSBPL3
TRIP13
FAM50A
CPSF1
ADGRL1
HMMR
P4HA2
CYP2W1
MCM2
GSDMB
IGF2BP2
NOTCH3
PPP2R2C
TEAD2
GTSE1
WDR62
MCM6
SLC46A1
SPAG5
MCAM
UBE2T
DCX
ACTN2
SMC1B
MAP2
FAP
HOXA9
ITM2A
CBFA2T2
TP73
SLC1A3
SP140
PAFAH1B3
KIF22
SCGN
RDH8
COL5A3
RBL1
CROCCP3
NDC80
AFP
IMPG2
ARG2
JMJD4
C1QTNF3
TRAF5
SEMA5B
RPS5
CAD
MECOM
TTC39A
ORC1
RAD54L
MAST2
PPEF1
NOX4
BAX
MT3
LPCAT2
PTHLH
AURKA
DNMT3B
TPX2
FER1L4
DOCK3
TMEM40
SLC4A11
CPXM1
TESC
GRAMD1A
KCNH4
BIRC5
OTUB2
ARHGAP4
PCBP4
LYZ
KIF4A
PLEKHG2
NAT14
LAMB4
NRCAM
ITGA6
SMPX
NLRP1
ORC6
ANGPT2
CD200
CCDC80
RNF31
WDR76
CLSPN
TGFB2
CDC45
CDC6
MSH2
DHPS
WHRN
PDE6C
TLL2
TREM2
PGC
CDC7
PRTFDC1
TSPAN15
FBXL19
HCN2
MMP11
RNF215
PPM1F
SLC35E4
CRYBB2P1
GRK3
CCDC134
CENPM
SEPTIN3
KDELR3
DMC1
RSPH14
SBF1
MIOX
BIK
MCM5
RASD2
CABP7
SYNGR1
SGSM3
UPK3A
KCTD17
HDAC10
COCH
POLE2
CDKN3
CHGA
SIX4
BDKRB1
MMP9
VSX1
PYGB
GINS1
MYBL2
PABPC1L
EEF1A2
CDC25B
RNF24
FERMT1
TLDC2
E2F1
FAM83D
PIGU
VSIG1
PAGE4
ABCD1
SYP
PLP2
NAA10
TAZ
PHEX
GABRE
FGD1
SRPX2
CENPI
GLA
DGKH
HSF4
GDPD3
SLC7A6
HAGHL
RHBDL1
AQP8
PYCARD
TMC5
RASL12
IGDCC4
CEMIP
CEP152
OIP5
MYEF2
PDGFRL
RIPK2
LAPTM4B
NIPAL2
GDAP1
NDRG1
ZC2HC1A
GSDMD
PYCR3
EEF1D
SQLE
MCM4
DHDH
TUBB4A
SF3A2
AMH
STX10
IL4I1
TLE6
ASF1B
CCNE1
FBL
SLC1A5
APLP1
RPS19
ICAM5
CCDC114
LIG1
PLA2G4C
CAPS
PLPPR2
BCAT2
KCNN1
ARRDC2
COMP
UPK1A
SIPA1L3
ZNF85
SMG9
DNAH11
DLX5
HOXA3
HOXA5
IQCE
HOXA13
STX1A
CRHR2
GHRHR
HSPB1
PTCD1
NUDT1
IMPDH1
MOGAT3
PLOD3
CLDN15
EZH2
SFRP4
BLVRA
LIMK1
FSD1L
CA9
LHX3
TLX1
KAZALD1
DKK1
EBF3
UBE2S
RPL28
KRT23
TRIM16L
CDK5RAP3
RECQL5
ALDH3A1
KAT2A
HSD17B1
CNTNAP1
DLX4
COL1A1
MPP2
RANGRF
NAT9
TMEM104
ODAM
CPE
NEIL3
NKX3-2
MFSD10
NCAPG
CCDC34
SNX15
UPK2
NECTIN1
MDK
NAA40
TCIRG1
CHKA
VWF
ASIC1
CYP27B1
GLI1
FOXM1
RAD51AP1
OGFOD2
VDR
CDCA3
SPSB2
FANCE
MCM3
GLP1R
RBM24
CAP2
TSPO2
COL9A1
VNN2
GMNN
ARFGEF3
MDFI
PTK7
CUL9
TTK
LAMA4
CLIC5
MEP1A
CEP72
KIF20A
LOX
SPARC
HAVCR1
THBS4
BTNL8
RASGRF2
GABRG2
LMNB1
STC2
DBN1
UNC5A
SMC4
RBP2
PFKFB4
COL7A1
ECT2
GNAT1
PLXNA1
PODXL2
CSPG5
ABCC5
TNNC1
ADAM23
TP53I3
CENPA
TLX2
REG1A
GLS
OTX1
WNT6
ABCB6
PASK
QPCT
ARID3A
VAX2
BCL9
PRRX1
SCAMP3
DNAJC6
TFAP2E
KIF21B
RIMS3
ST6GALNAC5
MFAP2
ACTL8
IGSF21
PLA2G2D
SLC2A1
CDC20
ARTN
TNFSF4
PLPPR4
STMN1
NEK2
NENF
CENPF
CHRNB4
ZNF541
KIF14
CNR1
PMFBP1
SPP1
RARRES1
PCDH17
C1orf198
PHF19
C19orf25
ACYP1
LTBP2
DNMT3A
ELOVL3
CNNM1
HELLS
HOXB8
MOB3B
MTHFD1L
CCDC170
CENPL
KCNJ5
TEX11
NUDCD1
SOHLH2
ZNF706
TRIM25
TBX4
NCAPH
TRIM6
BCL2L14
LHX4
KIF18A
ADGRB2
TMEM54
CSMD2
GPSM2
PAEP
PTGFR
KIAA1549
PLAU
ZWINT
CDKN2C
DDX39A
CENPK
SPATS2
STIL
HJURP
AGO2
CKS2
PI3
SLC12A5
ARHGAP40
BCAS4
NEURL2
POF1B
F13A1
BTN2A2
BTN2A3P
SNRPC
ABCC10
AL365205.1
RPS10
H2BC11
OR2B6
APOBEC2
KLHL31
SOX4
SCGB2A1
SSUH2
ABCC4
HROB
UPF3B
TMEM255A
SOX9
SLC25A35
MSTO1
MIR9-1HG
PAX8
TNFSF9
SNRPD2
RTN2
TGM3
RBCK1
SNRPB
BFSP1
TCF15
MCM8
BANF2
TMEM74B
FAM110A
MMP24
NECAB3
DYNLRB1
ROMO1
CEP250
GRPR
ST3GAL3
XRCC3
KIRREL2
HCST
WNK4
GLIS2
SSX1
SIX1
DLGAP5
PRDM7
CTAG2
AVPR2
TRAF2
TSPAN8
TAS2R4
IDUA
AUNIP
F2RL3
SYNGR3
PKMYT1
CHTF18
GNGT1
ADM2
ASPHD2
SDF2L1
GNAZ
MCHR1
BAIAP2L2
C22orf23
RIBC2
PODXL
STRIP2
FLNC
HOXD3
GAD1
HOXD9
HOXD10
ARHGAP22
KNSTRN
PSMA1
PALLD
KCNC1
TPH1
E2F8
PIMREG
AP1M2
RNASE1
QRICH2
RHBDF2
FGF13
SGO1
PRRG3
FAM155B
TOMM40
RPL36
ATP8B3
PLVAP
ARPC1B
UNC13A
LSM4
SULT4A1
TNNI2
COL5A1
FIBCD1
ARHGEF16
DNMT1
SLC6A8
PNCK
PLXNA3
DUSP9
POLN
COX4I2
C1QL1
HIGD1B
CCL25
GINS2
IDO1
RAB11FIP4
TUBG1
PSMC3IP
ACLY
MAP1B
TOP2A
PPP1R1B
CHD1L
FAAP24
C19orf57
RTBDN
MATN3
EMILIN2
RAMP1
POPDC3
REEP2
PCNA
RHBG
KHDC4
BCAN
TESMIN
MUTYH
EPHB2
KMT5C
MYO18B
C1QTNF6
ZNF767P
DYDC2
SPINK5
E2F5
TTC9
LOXL2
ADAMDEC1
CCNB1
PSRC1
SORT1
TRIM45
TMEM106C
MYCN
NAV1
SPOCD1
CDCA8
DTNA
DAGLA
DHX34
COL4A2
NREP
GOLM1
MSI1
RNFT2
BICDL1
KCP
MRAP2
PRR5L
EHF
TROAP
B4GALNT1
PKIB
MICAL1
SEMA4F
EMX1
PCNX2
CAPN9
KIAA1614
PIGC
LAMC1
TTLL4
ARMC9
PLXNC1
CKAP2
BORA
IGF2BP3
TTYH3
ABHD17C
ALPK3
CIB2
MYCBPAP
BRIP1
GALNT5
VPS45
ST6GALNAC4
DPM2
GABBR2
CTSV
DSCC1
ARHGEF39
IGFBPL1
ZSCAN9
TFAP2A
CAPN11
TINAG
LRRC1
FOXF2
UQCC2
HMGA1
TCF19
PGBD1
ATAT1
NRM
VARS2
C6orf52
FHDC1
IL18BP
PI15
GGH
SULF1
TRPC6
KIF23
ITGA11
KNL1
PAQR5
ITPKA
DUOX1
STRA6
CYP19A1
SLC44A5
CGREF1
CENPO
TRIM54
MYOF
LOXL4
STAMBPL1
KIF11
CEP55
KIF20B
ZNF365
DNA2
BARD1
MNS1
PPCDC
SEMA7A
ZGRF1
CXCL9
CENPE
LEF1
EGF
SLCO1C1
VAMP1
SYCP3
GAS2L3
FAM222A
FOXN4
BRCA2
ANKRD52
RHOF
DIAPH3
ZIC5
CDH24
MDGA2
SLC38A6
DUOX2
GCNT3
DISP2
COMMD4
UBE2Q2
TPM1
PIF1
HAPLN3
FANCI
TICRR
DET1
MFGE8
SLC5A2
NKD1
NLRC5
CDH13
OSGIN1
TIGD7
GNAL
ZMYND15
SLC16A3
TRIM65
CBX8
RNF157
CEP131
TNFRSF11A
P3H4
CACNA1A
PLPP2
TMEM91
PGGHG
TRPM2
NTN5
LMTK3
ERVK3-1
FBN3
SLC2A5
FHAD1
PLK4
KIF2C
BEST4
TMEM61
IGSF3
GPR161
UCK2
MAEL
ILDR2
FCGR2A
NUF2
CRABP2
RFX5
SEMA6C
OAZ3
DTL
VASH2
TAF1A
HHIPL2
ADAM15
JTB
SLC39A1
EFNA3
KCNN3
HCN3
ACTA1
TTC13
CNIH4
CNIH3
C1orf35
PYCR2
ZNF514
DQX1
LYG1
CDCA7
FAM171B
PTH2R
HES6
FANCD2
MARCHF4
COL8A1
AMT
MANF
TM4SF19
CCNA2
ADAMTS16
HAPLN1
ZNF300
N4BP3
CPLX2
KAAG1
TRIM7
PRIM2
CRIP3
NFKBIE
MMS22L
MTFR2
WASH2P
CDCA5
SSC4D
PSPH
TRIM50
STRA8
NCAPG2
DIPK2B
RAB41
ITGB1BP2
IL2RG
GCNA
GPC3
FATE1
PXDNL
RGS20
GINS4
RPL7
ATP6V0D2
LRP12
POLR2K
MAL2
NDUFB9
GSDMC
ZNF7
ARHGAP39
NAPRT
CDKN2B
CDKN2A
SHC3
PLPPR1
NR6A1
PTGES
LCN2
MKI67
CYP17A1
MTG1
ADAM12
RGS10
SERPINH1
PAK1
ST14
INCENP
ZP1
PLCH2
CHEK1
C20orf144
SPATA25
DSN1
SOGA1
LTO1
ALDOA
TLCD3B
CDH8
TMCO3
LYPD1
CCDC102B
C11orf53
ABCB9
SLC7A11
GPR158
CACNA1C
DLG5
ANO4
MFSD6
RNF144A
TMEM45B
CENPU
BICD1
ZNF385D
CENPJ
AP1S3
PTPN14
MGAT5
TMEM163
HSPB8
SPC25
SH2D6
SPOCK1
ZNF547
DCLRE1C
SPARCL1
CCNO
PART1
LGI2
CENPH
TEKT5
PTPRR
CYRIB
LPCAT1
C7orf31
GDPD1
SLC5A10
CABYR
ANKRD29
THY1
ROBO3
WNT3A
TRIM11
ENAH
ELOC
LY96
CHODL
PDE1C
SKA1
RAB6B
EME1
ACSS1
FBXL18
ATP6V1C1
OTUD6B
KIF5A
BATF
UQCRB
MTERF3
RPL30
FBXO43
CD109
MAPK13
TBC1D31
NTAQ1
ATAD2
FBXO32
NSMCE2
LHFPL4
BUB1B
EXOG
LRP8
ZFHX2-AS1
CLEC18A
CCNB2
FAM81A
TMEM164
CREB3L1
ZNF618
DGKI
SNX22
ACAN
PSMG3
GAREM2
DRC1
ANKRD61
EXTL1
UBXN11
RHPN1
ESYT3
COLEC12
RNF207
RHBDL2
CDC25C
H4C8
NRG2
DNAH3
DYNC1I1
PAGE5
TAGLN2
SLAMF8
NPM2
FGF17
SLC5A11
TOMM40L
MPZ
IFNAR2
LAD1
HOXB13
CIART
CCDC24
IGF2BP1
CBR3
CHAF1B
SCUBE1
PSMD4
ATP13A2
HK2
STARD9
ISL2
ACE
SPON2
FAM131B
CCDC28B
IQCC
WDR4
HSF2BP
G6PD
CSTB
SPATC1L
C21orf58
CLDND2
ZNF208
SLC2A6
GPSM1
CFAP157
PKN3
BRSK1
JAML
TLCD1
RUSC1
GBAP1
FAM189B
PAQR6
VPS28
TONSL
RECQL4
LRRC14
PPP1R16A
FOXH1
MRNIP
SQSTM1
RPL8
CELF5
PLXDC1
GRIN2C
KASH5
MPP3
ASB16
FAM171A2
DBF4B
FMNL3
RACGAP1
SPC24
ADCY10P1
CCDC78
TEDC2
CCNF
PAQR4
PDZK1IP1
PRKAA2
ZSWIM5
RAVER2
RBP7
FBLIM1
PDPN
KIAA1522
GBP2
ATXN7L2
PEA15
OLFML2B
FLVCR1
PKDCC
CAPN2
KIAA1841
TRIM17
KCNF1
FBXO41
ACTG2
ANKRD23
MSX1
BNIPL
SCNM1
S100A11
TDRD10
ALPI
PYGO2
DCST2
DCST1
INAVA
LINC01116
TRIM46
KRTCAP2
TSACC
CCT3
TMEM79
SSR2
CIP2A
HDAC11
SGO2
SERPINI1
EIF5A2
RPL22L1
CTLA4
HPS3
UCN
SPDYA
KIF15
CAMK2N2
RHO
IGF2BP2-AS1
RFC4
RPL39L
TKT
MELTF
S100P
ABLIM2
CLDN19
H2AZ1
CDC25A
ZNF589
BSN
POC1A
HMGB2
MAD2L1
ITGA2
EDIL3
ELOVL7
CCDC112
SPINK1
ESM1
CDC20B
EBF1
TERT
RAET1E
GALNT10
PTTG1
RELL2
USP49
HEY1
FABP5
COL1A2
SLC13A4
SBSPON
TMEM74
FOXK1
COX6C
OSR2
FZD6
CTHRC1
DCAF13
TMEM65
CPA6
TMC1
RASEF
ANKS6
RNF183
MELK
SKA3
DDIAS
DRGX
JCAD
E2F7
RAPSN
SMCO2
IFI27L1
SERPINA12
GPR176
AC126323.1
PPP1R14D
MSS51
PKD1L2
MCM7
TMED3
IQCD
CDH16
MMP10
TVP23A
HTR3A
CATSPER2
STRCP1
PCLAF
KIF7
MESP1
C18orf54
PLK1
MYO1A
C15orf48
B4GALNT2
C15orf39
LOXHD1
ENGASE
TBC1D16
TEPSIN
PRRT2
PPP2R3B
CA4
TPM4
MVD
CDT1
RSKR
PROCA1
CACNB3
RHEBL1
LAIR1
LAIR2
TMEM145
PSCA
CHAF1A
MFSD3
KIFC2
C19orf48
ZNF83
HID1
EVPL
TK1
CYP7A1
DNASE1L2
SPINDOC
RPSA
ENTPD3
SAC3D1
SLC22A11
SCARA3
PBK
NT5DC2
COA6
H1-4
DTYMK
BDKRB2
FEN1
ADAM9
FAM178B
SHOX2
VAMP5
STXBP6
TM4SF20
CPLX1
PARM1
PCSK9
RAB3B
THBS3
SLC50A1
CXCL10
CXCL11
B3GALNT1
GPRIN1
NR0B1
KCNK9
COL22A1
HTRA4
CLIC3
CKAP2L
BOLA2B
HIC2
BUB1
SPNS1
CHRNA5
TMEM266
ROBO1
CALML6
KLF13
MYO7B
CHD3
GPR37L1
FOXD4
HOXD4
FABP6
CNGB3
CDK1
FABP4
CST2
CST1
LRRN2
KRT86
COX7B2
TMC7
SIX2
COMMD5
GTSF1
DPY19L2P2
CAVIN4
ZNF296
HOXB9
TTLL6
CDCA4
BFSP2
CEL
PLA2G1B
CYTL1
CAVIN3
FAM86JP
KYAT1
KCNMB3
ZNF692
OPRPN
NETO2
SHCBP1
ESCO2
APLN
ZNF581
KRT20
DLK2
COL24A1
P2RY6
NMRAL2P
PLEKHG5
LGALS4
RHNO1
RRM2
RPS21
PRND
FBXW10
SCG2
REG3A
GAP43
EPHX4
FRMD3
MTBP
MRPL13
C5orf34
BSG
CFAP53
ARNT2
GTPBP2
IL17D
ZNF738
SNX32
RPL38
MIR4435-2HG
ADCK5
CKS1B
AHSA2P
PLAC8L1
SNCG
FKBP2
CSPG4
ADGRG2
MUC13
C11orf80
AP000769.1
RNF213
TIGD3
GPR160
CBX2
TCAP
CD34
CYB561D1
PHLDA3
C11orf45
EXO1
ZWILCH
ZCCHC12
BBS1
TTC9B
TMEM81
TRAM1L1
SH3PXD2B
BRMS1
HRAS
DNAH12
CNIH2
NDUFA11
SEZ6L2
ASPHD1
FUT1
ZIC4
KLC2
UBE2C
FAM182B
CHST1
GOLGA8A
CATSPER1
CCNE2
ISX
LPL
MCTP1
TSGA10IP
UBQLNL
RMI2
B3GNTL1
ZNF169
SFN
ETV4
CREG2
HOXD8
TSPEAR
KLHL38
NUPR1
KCNE5
CRYBG2
SPHK1
ATAD5
ACBD7
ZSCAN2
B3GNT4
EID2B
RIMS2
LPCAT4
PRR15
CNTD1
DCAF4L2
AC008969.1
LMNB2
RBIS
PFN4
LRRC37A3
SOX11
TYMS
MAMSTR
TYMSOS
FUT2
TOB2P1
LY6H
C19orf18
NAP1L4P1
CLVS1
ZFAS1
ERICH5
ZBED2
IRX3
HASPIN
GBA
CD163L1
SRRM3
CRACR2B
CD151
ANXA2R
SOX12
AC025171.1
ZBTB41
ALS2CL
TSSK6
PLEC
MCMDC2
GPR35
ERFE
CPNE7
C5orf46
MSC
RFLNA
EXOSC4
AURKB
RRS1
C9orf50
AC020907.1
FAM133A
CYC1
GVQW3
DAND5
TMEM151A
MKRN3
SHARPIN
CIITA
ALOX15B
MAF1
WDR97
PCED1B
APOBEC3B
FOXS1
MROH1
AKAP5
TIGD5
B3GNT3
ZNF648
PUF60
PPP1R14BP3
TMEM150B
EMC3-AS1
TPRXL
LINC02363
OR51E1
HOXC9
CUEDC1
SCRIB
OXTR
FAM83H
ZNF572
ST20
C1orf105
NQO1
LINC02878
ZNF707
H2AW
TLCD5
CCL13
FANCB
C6orf223
TMIE
FDCSP
TNFSF15
ZFP41
PLAG1
MACIR
CLDN7
GINS3
SNRPE
RTKN2
DEXI
ZNF716
TDRKH
RGMA
ARL6IP4
IZUMO1
C8orf33
DCAF4L1
KCNJ14
FBXL6
NXPH4
CACNB4
CAPN12
KPNA2
LIMK2
TSPAN10
PLCB1
NTM
BRICD5
ANXA2
MAFA
MAGEB17
TSPEAR-AS2
GJC1
ZNF320
PYCR1
LYSMD4
WBP2NL
NEB
ARHGEF37
CSMD1
RIPPLY3
GPR19
GABRR3
CHST6
HSP90AB3P
PRR36
EPHA10
FHL3
CCR3
ZNF530
BMP8A
CMTM4
TRAIP
CHEK2
AIFM3
LIN9
PNMA3
FAM3B
IQGAP3
TREML3P
KCNQ3
ADRA2C
NR2C2AP
C1QTNF12
PGP
IRAK1
H2AC20
SRPK3
H1-5
MAP7D2
PLA2G6
AP001062.1
KNTC1
CCR10
PTP4A3
CEND1
CDCA2
OSBP2
PRR16
JAG2
FAM227A
ANKS1B
MANEAL
ANO9
HSF1
H2BC13
INPP5J
LINC00482
NRBP2
IL3RA
CCDC137
C12orf56
MAPK11
SMYD3
KPNA7
PARPBP
AC138393.1
L3MBTL1
SPATA45
OLFML2A
INKA1
PDIA2
NDUFA4L2
SYN3
MYBL1
ZNF696
SLC52A2
ARL17A
GNB1L
DNAH14
KLHL34
FAM186A
PLK5
NDUFA13
TAL2
CDIN1
KIF18B
SAPCD2
EDARADD
SLC51B
NUDT17
GLDN
CLCNKA
FOXD2
SPATC1
KIF24
CYP27C1
VSIG10L
TNFRSF4
TRABD2A
MAPT
ERCC6L
TNFRSF18
C1QL4
LINC02875
SPATA21
KCNJ11
CDHR4
COL4A1
SIRT7
PLEKHN1
ZNF385C
ERC2
GABRD
FANCA
DNAH17
ZFP69B
H1-2
CCDC157
DMBT1
AC091057.1
CYHR1
DNER
KLHL17
S100A3
CLCN1
MESP2
MAPK12
COL4A5
FAM166A
ZNF793
RUFY4
C3orf62
SBK1
PRR19
ZP3
PDCD1
ACTBP11
H2AX
INSC
FAM72B
NANOS1
ZBED6CL
QRFP
TMEM120B
FSIP2
SPRED3
TMEM201
FAM78B
ZNF563
FBF1
AC099489.1
UTS2B
C9orf152
MSANTD1
FAM111B
BLOC1S3
SP6
CLDN4
JPT1
AC069277.1
DRICH1
FHIT
ZKSCAN3
FAM53B
ALG1L
C8orf76
CXCL17
MYBPC1
ZNF676
AKR1C3
S100A4
PLEKHG4
COLCA1
ZNF681
HRCT1
GARS1-DT
ATP2A1
C9orf163
ZNF781
THEM5
C20orf204
ZNF775
ZNF605
RFX8
C20orf96
SLC6A9
AFAP1
BORCS6
FAM72A
XRCC2
MMP1
HRH1
LINC00173
H2AC13
S100A2
H2AC11
ZSCAN16
ADA
KRT39
CRACDL
H2BU1
PDLIM7
SLC39A10
LAGE3
MAFG
ZNF300P1
NPSR1-AS1
GAL3ST4
SRC
ZNF257
PCNX3
ADAM32
MAGEA6
CH17-340M24.3
GUCA2A
RAD54B
BLM
FBXL22
ZNF517
PDGFA
DMBX1
CCDC154
NMB
S100A10
CFAP43
HOXC6
STPG3
EME2
CCDC180
INKA2
GPAA1
SLC22A12
ZNF71
S100A6
DNM3
GOLGA6L9
SNHG12
AKR1B10
SFI1
ZNF544
ZNF251
ZNF607
SULT1C2
RPS6KL1
CACNA1E
AFDN-DT
MYL4
ASPH
TXNRD1
TPM2
FLVCR1-DT
ZNF43
WDHD1
ZNF789
DDX39B
SLC34A3
STK39
MAGEA1
ABCA4
ANKRD13B
TEX45
COLGALT2
EPS8L3
EGFL6
TMEM184B
ARHGAP11A
SELENOM
DENND4B
SHISA4
PRC1
CSAG1
CCDC167
SOWAHA
SMG5
SNORD104
SNORA70
RNU6-1209P
RNU6-194P
RNU6-595P
RNA5SP202
RNA5SP160
RNU6-117P
RNA5SP37
RN7SKP230
AC013549.1
AL590705.1
CARNMT1-AS1
AC012358.1
LINC01562
AC022080.1
LINC00449
AL645937.1
RBMS3-AS2
IGBP1-AS1
AL354919.1
LINC00501
EFCAB2
IBA57-DT
LINC02487
TCP10L3
SERTAD4-AS1
LINC00862
RAET1G
ECT2L
GPR52
TMEM244
MSTO2P
SPRR2E
KPRP
LINC00222
PNLIPRP3
HSD3BP2
HSD3B2
SMIM9
ADD3-AS1
C1orf146
CXorf66
C10orf62
AL354984.1
GLYATL3
LDLRAD1
TRPC5OS
SLC12A5-AS1
FOXO6
TCEAL5
RPA4
AL162293.1
NAP1L6P
NHSL2
AGAP6
TIMM23B
NPY4R
GPRIN2
SYT15
PTPN20
GGNBP1
AWAT1
DAXX
LINC02731
COL11A2
HLA-DOA
HNRNPCP2
PSMB8-AS1
TMEM235
COL15A1
TSBP1
PBX2
AGER
PJVK
MRPL38
SMIM5
ERICH2
SP5
STK19
BTBD17
LINC02783
ZBTB12
PKP4-AS1
LAYN
SLC44A4
SNHG32
HSPA1L
CASP12
MPIG6B
LY6G6C
AL451142.1
POTEKP
C6orf47
C1orf195
NCR3
PRAMEF17
PRAMEF7
MCCD1
MICB
ZNF551
MICA
PSORS1C3
POU5F1
MUC21
AL450124.1
DHX16
C6orf136
KRTAP5-10
PRR3
ACOXL-AS1
AC027801.1
LINC01123
LINC01257
TRIM10
TRIM31
AC115618.1
DISP3
HCG9
HLA-G
LINC02210
CBY3
C9orf57
IGKV1OR2-3
FAM153CP
MAMDC2-AS1
SPDYC
C9orf135
MALRD1
AC083899.1
IGKV1OR-3
AL163540.1
AL391987.2
TTC25
ST8SIA6-AS1
MROH6
AC011484.1
PNMA8B
IGFL2
IGFL4
KRT40
SPINK9
LRRC3C
ZNF155
GRXCR2
AC007389.1
CD177
PSG5
LRRC10B
PCDHA9
PCDHA8
PCDHA2
OR5G5P
CLLU1-AS1
LGALS7
SYCE1L
C2orf91
[truncated: 1,937 more rows]

## Sheet: liver cancer downregulated
SLC7A2
PDK4
SLC4A1
ACSM3
PRKAR2B
MPO
PON1
KDM7A
TBXA2R
ARSD
UPP2
PGLYRP1
TENM1
IYD
CD4
DCN
EHD3
GPRC5A
IL20RA
IGF1
MARCO
HGF
CYP3A43
CPS1
C8B
ALAS1
HSD17B6
ARID4A
MAP2K3
PEX3
MYOM2
C6
MYO16
RIPOR3
CP
FNIP2
TAB2
CAMK2B
DNAJC25
RIMBP2
MPC1
ACAA1
DGAT2
LTK
ST3GAL6
ATP2C2
NGFR
EYA2
TRAM2
GLP2R
KLF6
ABCC9
TGFBR3
PTPN3
FGF10
ST6GALNAC1
ARHGAP10
CDH19
SPP2
FCGR2B
FERMT2
CD5L
PTGS2
CDHR2
NTN4
TUBE1
ACAT1
ATP12A
FMO4
ACACB
CTTNBP2
FGFR1
BRINP1
AFM
PGM1
SLC4A4
CPB2
KCNN2
PGR
COL19A1
COBLL1
BCKDHB
GRHL2
SLCO1A2
IGSF9
FOLH1
HSD17B2
CETP
GNAO1
PHACTR3
TFAP2C
CASS4
GP6
F11
NOS1
P3H2
PITPNM3
ESR1
TBX15
PHGDH
GABRP
EPB41L4B
CYP26A1
TDRD1
CRTAC1
SMIM24
HIVEP1
SYDE2
IGFALS
GADD45B
SLC7A4
GGT5
SOX10
SLC5A1
RAB36
HMOX1
PVALB
GNPNAT1
GSTZ1
GALNT16
SLC10A1
SERPINA4
MTHFD1
CPNE6
PCK2
SLCO4A1
ANGPT4
HAO1
PAK5
OXT
BPI
LIPG
RNF125
NOL4
MXRA5
SRPX
ATP11C
F9
BMX
VGLL1
KLHL4
HTR2A
SLC25A15
DHODH
SMPD3
MLYCD
WFDC1
FOXF1
TRIM35
CA2
ESRP1
SLC39A14
PEX11G
CLEC4M
LILRA1
SULT2A1
PTPRS
FAM83E
GCDH
LILRB5
ARMC6
MAG
HAMP
TFPI2
NAMPT
PON3
ITGB8
TSPAN12
CPED1
SERPINE1
PRKAG2
GCK
SLC1A1
LHX2
CDC37L1
MPDZ
PHYH
CXCL12
ERLIN1
CPEB3
SORCS1
DNAJC12
PBLD
LGI1
ASPA
ENO3
RASD1
SGCA
EFNB3
RCVRN
CWH43
SULT1E1
ZNF330
ANXA10
AADAT
SLC2A9
HGFAC
FAM149A
DDX25
SC5D
B3GAT1
P2RX3
HPX
APOA5
APOC3
SOX6
EXPH5
HPS5
DAO
TSPAN11
SYT10
AKAP3
ALDH2
ART4
GYS2
DSE
MAN1A1
SERINC1
TPD52L1
BMP5
BACH2
VNN1
SLC16A10
ADGRG6
EPM2A
TENT5A
C7
GHR
NME5
AGXT2
LIFR
C9
EHHADH
RBP1
BCHE
HES1
FRMD4B
PLSCR4
CISH
ARHGEF26
VIPR1
FAHD2A
STEAP3
GALNT3
ACADL
PECR
EFHD1
KCNJ13
IL1RL1
IL18R1
ID2
RMDN2
RND3
CD207
SCP2
ANGPTL1
ERRFI1
LEPR
SLC35D1
AGMAT
OLFML3
CFHR3
HAO2
KMO
ACADM
ADGRL2
CD160
HMGCL
ABCD3
HSD11B1
MAN1C1
MTARC2
COLEC11
TTR
ALDH8A1
SGK1
ARG1
TCF21
ABCG2
KLF9
ECRG4
NR4A3
IRF2BPL
ACOT2
ZC2HC1C
ALDH6A1
CPN1
SFRP5
DUSP1
MSX2
TEK
RCL1
MYCT1
TNN
EGR1
SOCS2
ADRA1A
EPHX2
LRAT
DPPA4
DEPDC7
CAT
SLITRK3
TMIGD3
RASL11A
PLG
CD244
CNTFR
AKR1D1
NUDT10
EGR2
ACADS
NR4A1
SARDH
DBH
IL13RA2
PLP1
NRK
ACVR1C
G0S2
GPR83
TTPAL
SDC4
PTGIS
PCK1
CHST8
XG
PAIP2B
KCNK17
MT1G
MT2A
GOT2
HS3ST3B1
PLGLB2
FOSB
GNRH2
PCSK2
ID1
PROZ
NR1D1
CFP
PZP
OMG
MASP1
ATP13A4
PTPRB
ECHS1
STEAP4
ZFP36
APOBEC3A
FOXP2
LRRC4
MYO1B
PDE11A
IVD
ACKR4
BBOX1
ATP1B2
EPB41L4A
CDO1
CDKN1C
CBFA2T3
LDLR
GADD45G
ACE2
KIF1A
OLFM1
CYP2G1P
PNPLA7
ASS1
ANGPTL6
RGN
SYNE1
SLC34A1
NAPSB
GCH1
CCT6B
RAB25
DMGDH
KANK4
MTUS2
PEMT
SPART
BEX1
PRAM1
SEC14L4
SFTPD
LYVE1
UNC79
PEBP4
MRO
BHLHE40
CHL1
GSTM5
HMGCS2
VTCN1
NGF
SLC38A2
IL6ST
SOX5
SLCO1B1
KLRD1
FOLH1B
HOOK1
CYP2J2
TCN1
PDGFRA
CLDN10
PSAT1
FBXO21
DTX1
ADGRB3
PRRG4
AMHR2
GLS2
RDH5
PPP1R1A
MAP7
HEY2
REPS1
SLC19A3
ARHGEF4
STAB2
SLC41A2
SPRY2
EDNRB
SCN7A
BLK
IL1RN
SLC31A1
TLR4
ALDOB
MYC
IL33
GRHPR
ALDH1B1
PIM1
IRF4
RNF144B
SORL1
ARHGAP20
THBS1
SMAD6
SLC28A2
SEMA6D
GIPC2
DBT
KHK
CYP2C9
CYP2C8
DUSP5
OIT3
AOX1
FAM13A
RASGEF1B
BMPR1B
LARP1B
MMRN1
NAAA
CDKL2
SEC24B
MTTP
GABARAPL1
PIK3C2G
C1RL
SLC38A4
PHLDA1
DUSP6
AMDHD1
SLC46A3
LNX2
SLC39A5
RDH16
N4BP2L1
SLAIN1
MBNL2
CBLN3
FITM1
PELI2
JDP2
SERPINA10
SLC25A47
SORD
IGF1R
ARRDC4
CYP1A2
NTRK3
CHST4
NCOR1
ABCA8
MEP1B
GAREM1
RNF165
FBXO15
CBLN2
NLRP12
IGLON5
CFAP74
EPHA2
FCN3
CCN1
ALDH9A1
ECM1
MCL1
S100A8
MBOAT2
WNT9A
RHOB
ST6GAL2
TRPM8
CNTN4
RBMS3
GASK1A
CSRNP1
ITGA9
ADGRG7
NR1I2
AGTR1
SCD5
GC
CYP4V2
ROPN1L
SRD5A1
MYO10
BHMT
CRHBP
TSLP
MEGF10
CXCL14
TIMD4
GFRA3
MMUT
RASGEF1C
HMGCLL1
LGSN
CYP39A1
TPBG
PNRC1
RSPO3
IGFBP3
IGFBP1
CLTRN
SYTL5
CHST7
NXF3
CCDC25
PLPBP
PMP2
PLIN2
IDNK
ST8SIA6
NRBF2
A1CF
GLUD1
LRRC4C
PAMR1
GLYAT
NCAM1
TKFC
FEZ1
TMEM25
KLRF1
GPM6A
CD226
CNDP1
DLG2
PPP1R1C
FREM2
FOXO1
NOCT
BTBD11
ANK3
MAT1A
ALLC
CCDC3
QDPR
MMAA
NR3C2
ACSL1
TDO2
GFRA1
TLCD4
ASTN1
SETBP1
PDE3B
CAMK4
PLEKHH2
NADK2
GPR180
TCTEX1D1
PANK1
ADGRA3
BMP6
FRMD1
UBALD1
KCNJ16
PID1
HS3ST3A1
AK5
RETREG1
LONRF1
CCDC173
C21orf91
WNT7A
APCDD1
EPHB1
KLF10
PTPRN2
TTC39B
KDM8
MICU3
NAT2
PSD3
MIDEAS
GNA14
ADK
KCNMA1
SLC28A1
TSPAN7
TIAM1
GDF6
ITGAD
C8A
NRG1
CPT2
DHRS1
KCNJ15
ETS2
PALM2AKAP2
CFAP251
NLRP14
XDH
FANCC
CLSTN2
CD1D
ALAS2
CDA
PINK1
RCAN1
PADI4
CES5A
C1R
ALDH4A1
TCHH
UROC1
GNE
PTGIR
CPAMD8
ADAMTS13
FCN2
PTH1R
AZGP1
LY6E
PGLYRP2
SCGB3A1
SIGLEC11
IP6K3
SCIMP
CCDC42
MEIOB
CYP4A22
FAM151A
PLPP3
TMEM82
ALPL
DIRAS3
AGL
TRIM58
ATF3
MT2P1
WDR64
HAAO
LRRTM1
C1QTNF7
BMP10
S100A12
TGFA
NIPAL1
ANTXR2
PROK2
CXCR1
SLC2A2
ALB
PPM1K
SMIM14
ABHD6
DNASE1L3
PPBP
PF4
MTHFD2L
SLC6A20
LZTFL1
SGMS2
SLC9B2
BDH2
NDST3
MAP9
GUCY1A1
NPY1R
NPY5R
HHIP
RANBP3L
RNF180
CMBL
KLKB1
CITED2
SFXN1
PI16
HCN1
BMPER
KCNK5
DLC1
GPR146
CA3
NFIL3
FXN
SVEP1
TRPV6
FBP1
PCDH19
ZNF367
AQP7
AQP3
CFL2
ZCCHC24
MBL2
CRYL1
SLC18A2
CLEC1B
RET
SLC39A2
NDRG2
VWA2
CYP2C19
TTC7B
PDZRN4
ARL5B
LIPC
CMTM5
AVPR1A
ASPG
GABRB3
TMEM100
RAG1
MOGAT2
SERPINB8
RIC3
WEE1
HSBP1P2
NNMT
LDHD
PLIN1
GLYATL1
GPR182
NKX3-1
ART5
ACAA2
GPD1
TTYH1
KLK11
C3P1
SCARA5
FAM83B
ACOX2
FAM107A
CX3CR1
SCN11A
MFSD2A
HR
TNXB
SLC16A4
LINC01620
ABHD15
ATOH8
PXDC1
SIGLEC7
MAP2K1
AR
ATF5
ADRB2
P2RY12
BNC1
MT1B
MT1E
TAPT1
UGP2
TPST1
ZFPM2
TMEM154
SLC16A5
ADRA1B
FAXDC2
FOS
SLC30A1
CD14
HSD17B13
SERPINB9
SGCD
SOCS6
SYT9
FPR2
JUNB
UGT2B7
KRT19
KCND3
PDE7B
NAT1
GLOD5
MCC
DSEL
ETFDH
RXFP1
FGG
FGA
FGB
DSCAM
NMUR1
GPHN
GATM
AQP4
KLF11
SYNPO2
TTC36
MANEA
ACOT12
ADH6
LRRN3
ADCY5
ZBTB21
PPP1R3B
TRIB1
NDNF
AGR3
CCR9
UGT2A1
TRAPPC3L
PLK3
SPTBN2
C1QTNF1
SLCO4C1
KLHL15
SELP
ADGRE1
ZG16
SLC22A1
DES
SPSB4
YPEL2
CADM2
INHBC
PHYHD1
APOF
DPP10
TEX26
PRIMA1
MSRA
A2M
LRRN1
AQP7P4
CIDEA
AC104129.1
PRR18
GJC3
SPRYD4
KBTBD11
RNF152
NCKAP5
TCIM
SHMT1
DSCAML1
FZD8
C8orf31
NAP1L5
ST8SIA3
JUN
NAALADL2
ZNF354C
MAMDC4
GRAMD1C
RNF212
NT5DC1
ERBB4
THBD
GP5
CPN2
TMEM125
CDH4
EGR3
SLC17A8
GRM8
TPPP2
ITLN1
NRXN1
ZADH2
TH
CYP8B1
KCNE1
PRR26
WDFY3-AS2
CXCR2
CHRM2
DHTKD1
TMEM132C
TMEM132E
TMEM45A
P2RY13
TMEM252
AQP7P2
PNMA8A
UNC5C
C1S
KIAA2012
BGN
PLCXD3
C11orf54
ABAT
AC138356.1
CALN1
CTNNA3
CCBE1
RIPK4
TRIM61
TENT5C
ACSM5
TAFA1
OPCML
B3GALT5
LRRC55
TMPRSS2
PCDH9
COLEC10
ACTRT3
LRRC19
PROS1
ZFP1
SOCS3
SLITRK6
C14orf180
RALYL
TCEAL2
MUC6
SLC22A10
F8
MAFF
MROH2A
CDNF
ZFP36L1
NTF3
ADARB2
NRG3
SLITRK2
AC012085.1
AGBL4
CYP4F2
SOWAHB
GABRA5
FCAR
MYT1L
CYP4F3
PDE2A
CARMIL3
MPPED1
SERPINA11
CYP4A11
LILRA5
MT1X
MAGI2
C11orf96
ADH1A
TMEM220
FYB2
COL14A1
DCUN1D3
SERPINA5
COL25A1
PRELP
ENTPD8
BEND4
LRRK2
SHLD2P3
IL1RAPL2
NKAPL
NUGGC
ALKAL2
FAM180A
KAZN
GSPT2
IL1RAP
PTPRT
SPOCK3
FAT4
KIF19
ACADSB
ADH7
PRTN3
TSC22D2
ESRRG
SULT1A1
CCDC196
SULF2
ADH1B
TMEM26
FAM163B
SERTAD1
ADGRA1
IL27
LYPD2
CYP2B6
OGDHL
SLC28A3
BCO2
ENPP1
KLHL14
ADAMTSL2
DLGAP2
SULT1C4
ADH4
SOWAHC
MT1F
CNGA1
SH2D1B
LPA
PAPSS2
MT-ND6
MT-CO2
MT-CYB
SLC5A3
MTCO3P12
MT-ND2
RASSF9
MT-ND5
BRINP2
MT-CO1
SUCNR1
MT-ND3
MTND4LP30
MT-ND4
MT-ND1
MT-ATP6
L1CAM
GPRASP1
MT-CO3
DMD
MFAP3L
RNU1-70P
RNU6-529P
SNORA33
RNU4-1
SNORD14E
SNORA65
KIAA1671-AS1
FAM78B-AS1
ZNF525
POLH-AS1
AC105020.1
AL353740.1
INF2
PDCD4-AS1
IQANK1
AL139353.1
LINC01285
CHML
STUM
TATDN3
MIR29B2CHG
CR1
C1orf53
SAMD5
PRDX6-AS1
FCGR3A
CENPW
FAM229B
FANK1
EEF1AKMT2
DDO
CCDC162P
PLPP4
H2BC18
ATP1A1-AS1
GDI1
PCMTD2
SOX18
LIME1
AL121827.1
SAMD13
RTL8A
EFCAB7
ZYG11A
LINC01270
LINC00963
SYS1
NEU4
MAFB
TRAF3IP1
CHIC1
GIGYF2
C2orf72
PHACTR4
ASAH2B
ZDHHC18
TMEM273
AGAP9
LRRC37A5P
MACO1
ZDBF2
TCEA3
HSD17B8
RXRB
OXLD1
BRD2
PSMB8
SPIN3
NBDY
HLA-DRA
NOTCH4
RNF5
AGPAT1
FKBPL
CYP21A1P
DXO
NELFE
SDHD
EHMT2
HSPA1B
HSPA1A
LSM2
VARS1
VWA7
MBD5
MSH5
ABHD16A
LY6G5C
GPANK1
FAM155A
PRRC2A
AIF1
LST1
NFKBIL1
ZNF814
ZNF805
HLA-C
GUCY2EP
CCHCR1
MRPS18B
ABCF1
LILRB3
DDR1
LRCOL1
GNL1
HLA-E
TRIM15
ZNF616
RNF39
PPP1R11
HLA-J
ZNRD1ASP
RACK1
TBC1D8
HLA-F
ASPDH
AKT1S1
GABBR1
MIR1915HG
AL133464.1
STARD7-AS1
TRIM27
RANBP17
CBWD4P
ZNF204P
SMPD5
ATXN2
DCTN1
FAM216A
ZBTB48
FAM201A
NAT8B
AC021218.1
MZT1
LINC01545
UQCC3
FBXO48
ATP6V0E2-AS1
ZNF425
C12orf73
PCDHGA1
ARHGEF34P
AP000812.1
SPIRE2
PKHD1L1
SLC35B4
TMEM231
FAM71F2
TMEM240
LINC02716
SDHAF1
PSENEN
LINC00654
ZBTB10
C4orf46
LGR4
PSMB10
E2F4
TMEM170B
MUC12
SNX2
NT5M
KRT17P4
TECPR1
MT1H
MT1A
MT1M
CFI
SAMD9
CNEP1R1
EXOC3L4
CCDC85C
CALML3-AS1
NAP1L4
SMG1P2
TMSB4X
TMEM256
CHKB-DT
SMN2
POM121B
HMGN1
DENND6B
AP001042.1
LCMT1
LIN52
ACOT6
DPF3
CYP2D7
ETFRF1
C17orf107
ITSN1
ITPRIPL2
DENND1C
CRYZL1
C5orf51
CATSPER2P1
ARRDC5
LOH12CR2
PLPP6
GMNC
TTC23L
FAM99A
RPS3AP47
C1RL-AS1
ZNF316
SRRM2-AS1
PDPK2P
RNPS1
HSP90AB2P
DNAJC19
JPT2
ZDHHC11B
TMEM191C
HERC2P9
GYG2P1
HBA1
ATP10A
DUXAP8
HNRNPA1P4
HLA-H
HCG27
RAB12
TMEM200C
HLA-A
HACD2
VGLL3
ANKRD28
METTL6
THUMPD3-AS1
XKR4
RNU6-1189P
MIR635
MIR570
MT-TL1
MT-RNR2
MT-TY
GPX3
SELENOH
DIO1
MT-RNR1
TSN
IGKC
IGKV4-1
IGKV6-21
IGKV3D-20
IGKV3D-11
IGLV8-61
IGLV6-57
IGLV10-54
IGLV1-47
IGLV1-44
IGLV1-40
IGLV1-36
IGLV2-23
IGLV3-19
IGLV2-18
IGLV2-14
IGLV3-9
IGLV3-1
IGLC3
IGLC7
TRGC1
TRBV20-1
TRBC1
TRBV28
TRBC2
TRDC
IGHA2
IGHG1
IGHG3
IGHM
IGHJ2
IGHV3-11
IGHV3-15
IGHV1-18
IGHV3-23
IGHV1-24
IGHV4-34
IGHV4-39
IGHV5-51
IGHV3-53
IGHV3-73
PRR22
TAS2R14
SNORD17
SNORD89
LINC01089
LINC02693
RTL8B
EWSAT1
RPL15P3
MT-ND4L
MAP10
AC016747.1
RPS15AP36
ZNF580
ZNF611
NUP62
COX20P1
AL445305.1
DENND1B
AL365357.1
Z99572.1
SFT2D2
CEP43
LPAL2
SCAF8
AL354714.2
ACKR1
ZNF254
TCTEX1D2
CRYGS
CRIP1
KLHL23
LINGO4
RPL22P1
MLLT11
GIMAP1
ARHGEF35
NOC2LP1
EEF1A1P16
EEF1B2P6
IFITM9P
NRAS
HNRNPA3P6
RPL7AP34
LTC4S
RPS7P11
AC108073.1
CHUK
MXD3
FTH1P12
GSTM2
LINC00671
COG8
ARHGAP19
LCAT
HSPD1P1
RPLP1P6
SIPA1
FTH1P3
SYNJ2BP
ARL2
FIRRE
GBP7
RBMXL1
SRA1
STIMATE
AC007000.1
RPLP0P6
C8orf82
LDHAP5
VDAC1
ZBTB9
TMX2
AL049873.1
RPL7AP50
NDUFS3
LEPROT
LBH
PPP1CB
GPSM3
NCKIPSD
ATF6B
S1PR3
SLC35F6
RPL17P50
HMGB1P10
PIGCP1
DDAH2
RPS29
ZNF337-AS1
CENPBD1P1
KPNA4P1
UGT2B11
ATP6V1G2
ZNF134
ACTBP2
OLA1P1
ZNF845
KLRK1
TMX2P1
EMP2
KCTD11
AC044787.1
YBX1P10
RPL13AP7
PPM1N
LTB4R
LTB4R2
CSNK1E
GALT
CLDN9
KRT18P17
ITGA1
RPS10P2
NUDT19
ZNF726
AP1G2
ZNF90
NAXD
TM6SF2
GANC
MRPL23
ZNF891
SMIM7
TSPAN4
CPNE1
ARL16
PAXIP1-AS2
MYCBP
AC132008.2
PRCD
ALG3
PTMAP5
GCC2-AS1
SMIM30
EEF1A1P12
KRT18P10
C19orf38
C17orf67
FIS1
RPSAP53
KCTD9P4
ANG
SCART1
APTR
AZGP1P1
AC009053.1
NEURL1B
HAUS3
RPS3AP26
KANSL1-AS1
BBIP1
LRRC37A4P
PLIN5
SEC14L6
STARD10
RPS15AP1
GTF2IRD2P1
MEG3
LRRC37A11P
NUTM2D
HMGN2P15
EML6
ZNF727
ZSWIM8
IFRD2
AC116407.1
ZBED1
HNRNPUL2
CSKMT
SEPTIN7P2
KRT16P1
AMD1P4
DHRS4-AS1
ASS1P10
LINC00598
GCGR
ATAD3C
PTGES3P2
AL136116.3
ASS1P9
TENM3
ASS1P1
RNU6ATAC35P
PLXNA4
CSNK1A1P1
HBD
AL357033.2
TFDP1P2
LINC02593
LINP1
ASS1P2
LINC01767
AC104809.1
AC007319.1
POU6F2-AS1
WARS2-IT1
AC005077.2
LINC00365
HTR2A-AS1
LINC00885
LINC02671
PRPF38AP1
ASS1P11
MTND2P28
PACRG-AS3
AC004540.2
AC073321.1
TSBP1-AS1
PCA3
ELFN1
MTND1P23
HAR1A
FTCDNL1
AC091729.2
CROCC2
AC092155.1
AL138749.1
AL359541.1
NCKAP5-AS2
EPS15-AS1
KRT16P2
LINC02708
LINC00310
MIR4290HG
LINC01714
RD3L
CALR4P
SEC63P1
ROCR
SNHG26
STIM1-AS1
PROB1
AL590723.1
CES1P1
AL023755.1
TNKS2-AS1
LINC00659
DHFR
AL445985.1
WEE2-AS1
MRPL45P2
THRB-AS1
AL033523.1
LINC01128
AC064807.1
LAMA5-AS1
BACH1-IT2
AL592494.1
PCDH9-AS2
AC092802.2
SEPTIN7-DT
EEF1DP1
UBAC2-AS1
RASA4CP
LINC01344
AP000355.1
RPS13P2
SATB1-AS1
LINC01205
AC091167.1
HNF4A-AS1
LINC01277
VDAC1P8
ZFAND2A-DT
AL137026.1
RPL41
ANKRD10-IT1
AC006001.3
PTGES3P3
LINC00242
MT1P3
LINC02768
ORM1
GK-IT1
AC079305.2
MTCO2P12
LRRC3-DT
DPY19L1P1
AC090587.1
LINC01715
HLA-DRB6
AC018638.1
RALGAPA1P1
AJ009632.2
PATL2
RPL21P37
AC053503.1
PANK2-AS1
ACVR2B-AS1
PRDX3P1
MTATP8P2
MBNL1-AS1
RPL4P4
NAMPTP1
ITGB1-DT
RPL26P6
MAST4-AS1
AC009237.3
MIR194-2HG
U91324.1
CXCR2P1
AC118754.1
LINC00399
XIST
ZNF688
PET100
AC018462.1
AC019205.1
STEAP3-AS1
OGFR-AS1
AC068533.2
LINC01315
AL157373.2
AC016999.1
RPS4XP5
ATXN1-AS1
AL589880.1
AC080129.1
AL118523.1
TOB1-AS1
RPL5P4
ALMS1-IT1
ANKRD36BP2
UBBP1
RPL4P6
AL162231.2
PRRT3-AS1
TMEM254-AS1
LINC02028
ACBD6
HOXB-AS1
C9orf147
IFITM3P4
AL450405.1
FTH1P5
PHBP9
AL358781.2
BANF1P2
ELOVL2-AS1
AL359893.1
AC004160.1
TPI1P2
KARS1P2
AC009245.1
TCEA1P2
AC004160.2
SERPINB9P1
ANKRD18B
PROX1-AS1
AP000695.1
PSMG3-AS1
AL139383.1
RPL19P21
PPP5D1
THAP7-AS1
AL645929.1
LIMD1-AS1
AL158071.2
ERLNC1
AC021078.1
AL450326.1
ACTG1P14
LINC02580
FTX
HM13-AS1
AC104461.1
AL160408.3
LINC01818
AC022816.1
KLHL7-DT
CEACAM22P
FBXW4P1
AC018638.2
AL589745.1
RPL10P3
AC092650.1
HLA-K
LINC01614
ZNF674-AS1
OCLNP1
FBXW11P1
HAO2-IT1
GCNT1P3
HAR1B
LINC02884
LINC01750
AP006285.1
LINC02723
LINC00574
AKAIN1
MMADHC-DT
NCOA7-AS1
GNG12-AS1
AL078590.2
AC092809.2
AC079465.1
SLCO4A1-AS1
AF165147.1
AC018742.1
MIR3936HG
SNHG7
PTPRN2-AS1
LINC00884
AL391422.2
AL353764.1
LINC00892
AC093797.1
LINC00702
AC138356.2
AL138889.1
AC093157.1
DHCR24-DT
LINC01687
AC016876.1
AC079807.1
LINC00472
UBE2E4P
HMGB1P31
GPX1
RASA4DP
OSTN-AS1
PFN1P1
UBE2FP3
CHRM3-AS2
GTF2IP4
MTND4P20
NKAPP1
UICLM
LINC01719
AL133419.1
LINC01783
EIF3FP3
RPL17P11
AL445524.1
EEF1A1P6
AC008105.2
TMEM238
ZNF529-AS1
B4GALT1-AS1
AL161630.1
AC231533.2
CYP51A1P2
LINC02640
LINC02609
AC133435.1
TWIST2
LINC01137
AC108047.1
RNASEH2B-AS1
GAS6-AS1
RPS15P4
AC131011.1
H2BC15
EIF4HP1
AC005083.1
ADH5P4
DLG5-AS1
LINC01503
RPL10P9
RPS28
CTC-338M12.4
UQCRHL
UBE2SP1
AL359715.1
RPL5P34
EIF2AK3-DT
NUDT9P1
AL390879.1
AC074117.1
AL049552.1
SRP14P2
RPL13AP6
TRIM26
LINC02535
AL513165.1
AL355355.2
LIX1L-AS1
BOK-AS1
MAGI2-AS3
RPL34-DT
AP000253.1
AL603840.1
DPP10-AS1
CYP2C58P
GXYLT1P6
BX842568.3
KIAA0040
RBMS3-AS3
AC110995.1
ADORA2BP1
AL161740.1
SUCLG2P2
HAND2-AS1
AL157832.2
Z99289.1
ELAVL4-AS1
AC006960.2
MGC27382
AL161629.1
MTCO1P12
LINC02037
LINC01625
LRIG2-DT
LINC00707
CLRN1-AS1
ST3GAL6-AS1
DEFA3
LILRA2
AC092969.1
PLGLA
NSUN6
CD302
INMT
AC063938.1
HOGA1
AC092597.1
RTL5
AC119424.1
LINC02027
AL109933.2
MT1HL1
FAM3D-AS1
ERVFRD-1
HBB
AC087521.1
CYP2U1-AS1
AC106793.1
AC040168.1
SOCS2-AS1
LY6E-DT
AC079061.1
ADH1C
LINC02275
AC010280.1
AC096577.1
LINC01197
MTATP6P1
AC008549.1
LINC02428
AC116362.1
AC010280.2
HHIP-AS1
MTND5P11
MTND6P4
LINC01093
AC106822.1
CTD-3080P12.3
PDLIM1P4
AC106795.2
AC105384.1
GBA3
LINC01018
LINC01612
LINC02762
TRMT9B
RPSAP70
AC093725.2
GPR162
SNHG18
AC107396.1
MTCYBP35
LINC02153
CCDC71L
CPP
KBTBD11-OT1
AC019257.1
COX6B1P4
AC090796.1
PCDHGA10
LINC01863
AC100810.1
PCDHGA3
AF131215.5
ASS1P13
UBTFL10
MTRNR2L8
AP000439.2
MT1JP
MTRNR2L10
AP000763.2
PLBD1-AS1
HP
AP002761.3
SRSF3P1
LINC02388
ASS1P14
AC068305.2
AC007298.2
DIO3OS
AL133467.1
LINC02274
AL161668.4
RNASE4
LINC02289
AC007040.2
LINC02691
TMEM179
LINC00924
CTXND1
AC087477.4
AC012379.1
AC092384.2
PWRN1
AC026461.2
LINC00261
AC010547.2
MRC1
AC010336.2
AL031722.1
MT1L
AC099508.2
AC108860.2
AC020978.4
AC129507.1
PCDHGB3
LINC01979
AC087500.2
TMEM220-AS1
HID1-AS1
DLGAP1-AS3
GDF2
AC009831.1
PCAT18
AC005304.2
TXNIP
FXYD1
ERVE-1
AP001198.2
AC092296.4
SMUG1P1
AC005180.2
LINC00907
AC090227.3
AC105105.2
LDLRAD4-AS1
CLEC4GP1
FENDRR
AC022239.1
AL021328.1
AC113368.1
MTND4P35
BNIP3P28
AC106881.1
AC136601.2
AL031055.1
AL355612.1
AL354872.1
AC008592.4
AL359715.3
FGF14-AS2
AC012629.2
AC116036.2
AC015712.6
AC012360.2
AC092042.3
AC004832.5
BX640514.2
AL035661.1
ADRA2B
RCC1L
AC090970.2
AC006249.1
CCL23
AC026469.1
AL512791.2
AL391095.2
AL449403.2
AC008250.2
AL390755.1
ARHGAP23
TUBGCP5
AC084824.4
AL139385.1
[truncated: 66 more rows]

## Sheet: Lung cancer upregulated
TSPAN6
C1orf112
GCLC
SEMA3F
MYH16
WNT16
HECW1
KLHL13
FKBP4
KDM1A
ARHGAP33
SLC25A13
PRSS22
SLC25A5
HOXA11
DHX33
LIG3
REXO5
YBX2
TMEM132A
DLX6
BAIAP2L1
TTC22
CCL26
GGCT
DBF4
GTF2IRD1
NOS2
CEACAM7
PAX6
RPUSD1
E2F2
JARID2
TFAP2B
CELSR3
PLEKHG6
MAPK8IP2
PAX7
SPRTN
CD9
NCAPD2
PRSS3
FMO1
DPF1
SYT7
ANLN
GABRA3
BRCA1
PRICKLE3
PSMC4
SLC25A39
DDX11
TACC3
POLA2
ACP3
BID
ISL1
CLCA4
CNTN1
CYP24A1
SYT13
SNAI2
ZFP64
SPAST
STRAP
ABCC2
GCLM
DEPDC1
KCNG1
INSRR
ARNTL2
IBSP
HMGB3
BAK1
CENPQ
EIPR1
LRRC7
UBA6
APBA2
FAM136A
DEPDC1B
NSUN2
METTL1
HOXC8
CDH1
BEST2
SPDL1
RTN4R
LSG1
TNC
TDP1
TG
ADAM28
BARX2
DCUN1D1
ZIC2
TRIT1
DSG2
MAGEC2
USP28
R3HDM1
EPN3
RFC2
FOXP3
HOMER3
RAD51
POLQ
THOC3
MPHOSPH9
ALX4
FSTL4
METTL24
MRTO4
MCF2L2
ENTPD2
PTPRN
PLEKHH1
ZNF280C
PHF21B
GYG2
SERPINB3
PKP2
ATP11B
LAMC2
CAMK2B
NDC1
ALDH18A1
TARBP1
PSD
STYK1
COL11A1
QSER1
SPAG4
TNK2
CDH3
POLD1
GSC2
MTMR1
GPC1
INTS13
DLX3
DMRT3
NGFR
TAF2
EYA2
WDR3
MCM10
DGKA
NDUFB4
PACC1
SNAP91
COL17A1
SEC61A2
ME1
MTHFD2
SLC9A7
DIP2B
SLC9A3
NGEF
ASPM
MPPED2
MTFR1
PFKP
PHKA1
PKM
TRO
SYT1
FGFR3
PRR11
PSME4
PITX1
SDK2
GAL
FUNDC1
DRD4
HES2
ATP1B3
MAPK6
HDHD5
UFD1
PFN2
TMEM260
CLTCL1
RNF126
POLB
ASNS
CNGB1
ST6GALNAC2
CHAT
PABPC1
EPHA8
TRIP13
TCF3
HLTF
MYO3B
SLC6A15
LNX1
TFRC
HMMR
NDE1
CYP2W1
MCM2
MOV10L1
PANX2
TP63
NLE1
ADAM11
IGF2BP2
MAP3K13
GLI2
NOTCH3
CLNS1A
PPP2R2C
EED
CA12
ENO1
WSCD2
KCNQ2
TIPIN
NUP37
GTSE1
TIMM21
ADD2
CACNG5
FSCN1
PLD1
WDR62
DLG1
TUBA3D
MCM6
UNG
SPAG5
TPD52
UBE2T
EXOSC5
SMC1B
FAP
ADCY2
PMS2P1
HOXA9
TP73
DUSP13
PAFAH1B3
KIF22
KEAP1
PTPRH
EPHA6
CPOX
RBL1
NDC80
PKP1
IL12RB2
C5orf22
COL19A1
KCNK2
SERTAD4
OPRK1
SEMA5B
XPO1
TRPM3
PALB2
GRHL2
OXCT1
EPYC
SLC27A5
NKAIN1
KIF3C
CAD
IGSF9
WNT11
MTIF2
ORC1
RAD54L
AQP6
FOLH1
FAT2
PPEF1
ZW10
TMPRSS11E
L2HGDH
PTHLH
TFAP2C
AURKA
PIR
KHSRP
DNMT3B
TPX2
FER1L4
PDRG1
SLC15A1
TMEM40
SMOX
SLC4A11
LHX5
TRMT6
CHGB
FXYD3
BIRC5
MLF2
OTUB2
TFAP4
FETUB
DNAJB11
KIF4A
DLL3
DTX2
PUS7
NRCAM
ITGA6
SMPX
ORC6
ZFHX4
RGS17
MYH7
SLC7A8
GEMIN2
TGM1
TYRO3
WDR76
TBX15
PHGDH
COL9A3
CLSPN
NUP50
CDC45
XYLB
KRT31
CDC6
MSH2
DHPS
HOOK2
TLL2
CYP26A1
IL11
MYO3A
SMIM24
SRPK1
TMEM14A
DSP
ACOT7
CDC7
ERMP1
MACROH2A2
FBXL19
MAGEB2
EFNA2
CEP170B
HCN2
TRMT2A
RANBP1
CRKL
MMP11
SMARCB1
DDTL
SEC14L2
PES1
SLC35E4
TOP3B
CRYBB3
LRP5L
SLC25A1
SH3BP1
HPS4
GCAT
MICALL1
CCDC134
SLC16A8
CENPM
SEPTIN3
DMC1
TCF20
TOMM22
MIOX
RHBDD3
BIK
MCM5
TTLL12
CABP7
SYNGR1
PNPLA3
CACNA1I
FOXRED2
KIAA0930
RANGAP1
PHF5A
TRMU
ZBED4
HDAC10
KCNK10
PRMT5
COCH
POLE2
TRIM9
GNPNAT1
CDKN3
PLEK2
ISM2
SIX4
SERPINA4
VRK1
APEX1
PABPN1
EFS
DHRS2
EMC9
GSS
MMP9
GINS1
MYBL2
RAB5IF
PABPC1L
SALL4
BMP7
RAE1
NELFCD
MRGBP
TCFL5
GID8
EEF1A2
PTK6
TRIB3
CSNK2A1
SLC52A3
RPS10P5
FERMT1
PAK5
NOP56
JAG1
E2F1
ASIP
AHCY
FAM83D
DHX35
SYNDIG1
CEP76
LAMA1
RBBP8
CSTF2
H2BW2
MXRA5
TBL1X
GPR143
PRPS2
AMMECR1
SUV39H1
MCF2
PLP2
SCML2
PGK1
SMS
GPR50
CDK16
GABRE
FGD1
ITIH6
SRPX2
CENPI
DRP2
TAF7L
KLF5
SLC25A15
OLFM4
ARL2BP
HAS3
NECAB2
ABCC1
HAGHL
SLC7A5
RHBDL1
USP31
SALL1
MAZ
SLC6A2
KNOP1
AP3B2
CEMIP
CEP152
TGM5
RHOV
OIP5
TRPA1
CALB1
LAPTM4B
POP1
DKK4
GDAP1
ESRP1
CCN4
NDRG1
TRPS1
GFUS
PYCR3
GSR
NEFM
TUSC3
MCM4
KCNN4
GYS1
LHB
TUBB4A
SARS2
KCNA7
LIN7B
PPP1R13L
RNASEH2A
KLC3
AMH
IL4I1
TIMM44
ASF1B
TNNT1
EPHX3
CASP14
SLC1A6
CCNE1
URI1
PDCD5
TIMM50
FBL
CCNP
GPI
NUMBL
FSD1
OVOL3
SLC1A5
CEACAM5
PTPRS
CNFN
GRIN2D
LIG1
THEG
MAST1
KCNN1
UPK1A
DDX49
ATP4A
LSR
CADM4
DNAJC2
ITGB8
DUS4L
DLX5
STEAP1B
PTN
MPP6
HOXA1
ANKRD7
HOXA13
STX1A
GARS1
CRHR2
EPHB6
CASP2
CHCHD2
HSPB1
EIF3B
NUDT1
PTPRZ1
AIMP2
TFR2
LSM5
AP1S1
RPA3
EZH2
POU6F2
POLD2
MYL7
GCK
YKT6
LIMK1
LHX2
CNTNAP3
CORO2A
PTGR1
DNM1
ELAVL2
NCS1
CA9
EXOSC3
ATRNL1
TLX1
TWNK
FGF8
NPM3
PITX3
GTPBP4
NEURL1
DKK1
GLRX3
UBE2S
PPIF
CYP2C18
KRT23
RUNDC3A
RAPGEFL1
WNT3
KRT37
TRIM16L
C1QBP
BLMH
ALDH3A1
PSMD11
KRT32
KAT2A
HSD17B1
DLX4
RND2
ALOX12
AC130689.1
SLC9A3R1
FOXN1
UNC119
ALDOC
NMU
ANXA10
GALNT7
NEIL3
NSD2
NKX3-2
NCAPG
UGDH
CCDC34
FOXRED1
CCDC86
PRPF19
CCKBR
CHORDC1
UPK2
NECTIN1
KIAA1549L
MDK
NAA40
SLC35F2
SOX6
POU2AF1
P3H3
PRPF40B
ASIC1
IL23A
BCL7A
CYP27B1
WNT5B
MAGOHB
TRPV4
FOXM1
RAD51AP1
GPRC5D
NAA25
OGFOD2
RASAL1
DDX55
SLC38A1
FZD10
RFC5
TIMELESS
MRPL51
GAPDH
GNB3
CDCA3
USP5
TPI1
ENO2
NT5DC3
SLCO1B3
CMAS
AC009533.1
PAK1IP1
TPD52L1
ULBP1
FBXO5
FANCE
TULP1
MCM3
CILK1
PRDM13
E2F3
COL9A1
WASF1
GMNN
NR2E1
PERP
UNC93A
MDFI
BYSL
DNPH1
TTK
CCN6
CEP72
KIF20A
SLC4A9
GABRG2
POLR3G
DROSHA
LMNB1
TARS1
IRX4
BRIX1
NUP155
C9
CDX1
EHHADH
SMC4
TBCCD1
TIMMDC1
HRG
CLDN16
NIT2
FAM162A
PCCB
RBP1
GRK7
RNF7
PDCD10
WNT5A
PFKFB4
COL7A1
FGF12
ACAP2
ECT2
TFG
FXR1
MORC1
UMPS
NCBP2
PODXL2
UPK1B
MRPL3
ABCC5
KLHL24
CLCN2
EIF4G1
SLC4A3
ADAM23
RTKN
POMC
CENPA
SLC30A3
PSMD14
PPM1G
REEP6
INO80B
TLX2
WDR75
IGFBP2
IGFBP5
CCT4
OTX1
HSPE1
KDM3A
IL1R2
WNT6
IL1RL2
SLC9A2
FHL2
ABCB6
SLC5A7
TPO
PROC
ODC1
NOL10
DLX2
SDC1
SLC1A4
PNO1
KISS1R
VAX2
MSH6
EPHA4
FARSB
MARK1
GPX7
CACYBP
RALGPS2
MRPL37
WDR77
HDAC1
PDC
RPE65
AGMAT
CFHR3
TFAP2E
TTF2
C1orf109
BMP8B
MYCL
SIPA1L2
MFAP2
KDM5B
ACTL8
SSX2IP
PLA2G2D
SLC2A1
CDC20
ARTN
B4GALT2
PRDX1
FMO6P
TNFSF4
DARS2
IRF6
UTP25
STMN1
NEK2
CENPF
POLR1G
RCN2
CHRNB4
MMP8
SLC8A2
KPTN
KIF14
TNNT2
B4GALT6
ATP10B
ELOVL4
MYB
ALDH8A1
PMFBP1
OLFM3
SPP1
SATB2
GDA
CPSF3
SENP5
HEATR1
ONECUT2
DCAF4
PGF
ACYP1
DNMT3A
ATAD2B
BCL11A
NKX2-3
CNNM1
HELLS
HOXB8
HOXB3
HOXB1
MSX2
GRIA2
CENPL
TNFSF18
TCP1
TP53AIP1
TEX11
MASTL
CCDC77
TNFSF11
SOHLH2
TMPO
LYPLA1
NCAPH
LRAT
ABCC11
RGSL1
CSTA
B4GALT4
NAA50
KIF18A
DEPDC7
PILRB
GJB6
GJA3
ADGRB2
ZNF639
TMEM156
TMEM54
HPCA
GPSM2
ZRANB3
GTF3A
FYTTD1
PAEP
PRXL2A
PMS2
CBX3
WIPF3
NXPH1
TWIST1
PHF24
NUDT10
PLAU
P4HA1
ZWINT
RBM19
NME2P1
CDKN2C
PRDX4
DDX39A
NLN
CENPK
SPATS2
HOXC13
HOXC11
HOXC12
SMUG1
STIL
HJURP
COL10A1
NRK
METTL8
ACVR1C
RAB38
PMS2P5
CKS2
INHA
CTCFL
PI3
TTPAL
CSE1L
MAGEA10
CHST8
XG
POF1B
LYPD3
NDP
GRM4
PACSIN1
XPO5
H1-3
RPS10
H2BC11
OR2B6
KLHL31
SOX4
RIOK1
RPP40
RUNX2
GOT2
TMTC4
SOX21
HROB
UPF3B
SOX9
MSTO1
MIR9-1HG
SRMS
SNRPD2
SDCBP2
DEFB126
PAX1
CSTL1
STK35
SNRPB
MGME1
TCF15
MCM8
FAM110A
MRPS26
ZNF436
FAM83C
ST3GAL3
XRCC3
PROZ
SLURP1
PDCD2L
KIRREL2
UBA2
KRT36
FRMD8
BCL2L12
FLRT1
STATH
TRAP1
AHDC1
EMG1
SIX1
DLGAP5
PLEKHG3
CTAG2
TIMM8A
IPPK
EDN2
BCL11B
PLAAT1
BEST3
YEATS4
CRYGN
AUNIP
OR7C1
SYNGR3
PKMYT1
CHTF18
TUBBP1
TUBA4A
VIL1
SEM1
GNGT1
MTERF1
LRFN1
RASL11B
PAICS
PPAT
ADM2
ASPHD2
A4GALT
BAIAP2L2
KRT17
VGF
STRIP2
CCDC136
SMO
FEZF1
MRPS12
HOXD3
MTX2
GAD1
HOXD9
HOXD10
HOXD11
HOXD13
KNSTRN
CHAC1
LOXL1
BBOX1
KCNC1
E2F8
SOX15
PIMREG
TXNDC17
KRI1
KLK14
KLK10
KLK8
PARP2
EGLN3
SGO1
TNNI3
GAMT
FAM155B
GDPD2
TOMM40
NCAN
KIF1A
GTPBP3
LSM7
RTN4IP1
EPO
KLHDC7B
LSM4
SULT4A1
TNNT3
H19
CYP2E1
MNX1
CEP85
RBBP8NL
PRDM12
EXOSC2
TRIM28
ATG4D
NPAS1
ARHGEF16
DNMT1
SLC6A8
PNCK
DKC1
DUSP9
NOL11
PKDREJ
ULBP2
ULBP3
C1QL1
TEX101
CCL25
GINS2
SLC34A1
F12
PRR7
HAUS8
PDLIM4
TUBG1
PSMC3IP
ACAP3
KREMEN2
TRAF7
BARX1
CA6
KRT34
KRT33B
TNS4
TOP2A
CHD1L
PRKAB2
SNRPA1
KRT17P1
FAAP24
LRRC9
PODNL1
C19orf57
RTBDN
SLC6A11
NUP210
LINC00470
SCLY
RAN
RPA1
COQ3
POPDC3
SEC61G
FIGNL1
ITGB4
EIF5A
SLC52A1
REEP2
ANKEF1
PCNA
DAP3
RHBG
KHDC4
BCAN
ALDH3B2
TESMIN
MMACHC
DPH2
LPIN3
TPTE2
CHRM3
TMCC2
CCNA1
RFC3
IRS4
MORC4
BEX2
EPHB2
KMT5C
MED10
MORC2
MYO18B
C1QTNF6
FAM83F
ACTR3B
NTS
ATP13A3
TMEM254
SPINK5
TEX15
GSC
ADAMDEC1
CCNB1
GSTM1
GSTM3
SYT6
PSRC1
WNT2B
PTGFRN
TRIM45
VTCN1
TMEM106C
YWHAQ
GRHL1
MYCN
LDHA
FST
NAV1
RAX
ANKRD16
KCTD1
SLCO1B1
LRP4
STK26
FOLH1B
CDCA8
HOOK1
DSC2
DSG3
DSG1
DSC3
DSC1
FHOD3
TIMM10
DHX34
TCN1
CLDN10
ARHGAP32
ACRV1
C9orf40
PSAT1
MSI1
RNFT2
BICDL1
HILPDA
FAM71F1
KCP
KHDC1
MRAP2
EPHA7
NAT10
EHF
PRRG4
CDK4
TROAP
B4GALNT1
ESPL1
MAP7
REPS1
SMYD5
CCDC142
EMX1
ZNF670-ZNF695
PCNX2
KCNK1
URB2
EGLN1
PAX3
SERPINE2
WNT10A
COX5B
EDAR
ARHGEF4
ALDH1L2
CKAP4
CKAP2
BORA
IGF2BP3
GPNMB
NUP42
BZW2
DGKB
TBRG4
TTYH3
CIB2
BRIP1
ACTL6A
NDUFB5
MRPL47
IL36G
IL1RN
IL36A
IL36RN
IL36B
IL1F10
HS6ST1
TXN
SMC2
PRPF4
CTSV
LMX1B
DSCC1
DMRT1
HINT2
ARHGEF39
PPIL1
TFAP2A
TUBB2A
LRRC1
BPHL
TUBB2B
UQCC2
HMGA1
TCF19
VARS2
FGFBP1
MRPL15
PI15
GGH
SLCO5A1
SULF1
SORL1
TMPRSS4
MMP7
DCUN1D5
TRIM29
MMP13
TMPRSS13
KIF23
ITGA11
KNL1
ITPKA
PAK6
STRA6
CYP19A1
BCL2L10
SPTBN5
SLC44A5
CLCA2
SELENOI
CGREF1
PNPT1
SLC5A6
SIX3
CENPO
LRPPRC
BTBD16
KIF11
CEP55
KIF20B
GPR87
TET1
DNA2
BARD1
OLA1
FAM117B
WDR12
ZGRF1
FGF5
IL21
CENPE
LEF1
EGF
C4orf17
FBN2
B4GALNT3
KIF21A
ALG10
PIK3C2G
SINHCAF
TMEM117
SLC38A4
LRIG3
INHBE
TMTC3
TDG
GLTP
FAM222A
SLC7A1
PDX1
RDH16
BRCA2
GALNT6
KRT71
DENR
ZIC5
GRTP1
CDH24
MDGA2
FRMD6
ARMH4
SYT16
RDH12
STON2
SORD
DUOXA2
DUOX2
GCNT3
IGF1R
PIF1
ADAMTS17
HAPLN3
RHCG
FANCI
TICRR
ST8SIA2
MARVELD3
CLEC18B
ADAD2
OSGIN1
RPL3L
DPEP3
RHBDL3
TAF4B
SLC39A6
GREB1L
SLC13A5
CARD14
RAB40B
EIF4A3
NARF
FOXK2
CBX8
ZNF750
RNF165
CBLN2
PMAIP1
P3H4
FKBP10
SAMD1
PLPP2
PRDM15
DUS3L
URB1
IL19
GEMIN7
CBLC
CARM1
CTU1
IGLON5
SLC2A5
PADI3
PADI1
ARHGEF19
PGD
MYOM3
IL22RA1
DMRTA2
PLK4
SYTL1
KIF2C
PTPRF
LMO4
IGSF3
CELSR2
UCK2
MAEL
ADCY10
NECTIN4
NUF2
PFDN2
FCRL5
MRPL24
ISG20L2
CRABP2
HDGF
XPR1
TUFT1
ZNF687
LSP1P4
HORMAD1
SYT14
KCNH1
DTL
INTS7
TAF1A
SUSD4
HHIPL2
FLG2
CRNN
S100A8
S100A7
EFNA3
ILF2
RIT1
PKLR
HCN3
FLG
C1orf131
NVL
CNIH3
C1orf35
PARP1
PYCR2
LBR
ETNK2
PPFIA4
SYT2
PDIA6
ATP6V1C2
ABCG8
CHAC2
SNRPG
ABHD1
DQX1
TMEM177
NT5DC4
SNRPA1P1
ZC3H8
LYG1
THSD7B
POLR2D
CDCA7
DLX1
FAM171B
HSPD1
CCDC150
PTH2R
ABCA12
ACKR3
TRPM8
HES6
FANCD2
IL17RD
IGSF11
SRPRB
MED12L
ALDH1L1
TMEM44
UCN2
STXBP5L
TM4SF19
MUC4
EIF2B5
OCIAD2
SLC10A6
CCNA2
GLRA3
NDUFS6
SRD5A1
SKP2
SHISAL2B
BHMT
MEGF10
CXCL14
SLC25A48
SPINK7
CPLX2
TENM2
TBC1D7
TRIM7
TNFRSF21
RASGEF1C
PRIM2
MLIP
ANO7
TTBK1
TPBG
MMS22L
FAXC
GABRR1
PM20D2
TBC1D32
RNF217
ABRACL
MTFR2
SLC2A12
PNLDC1
VWDE
SDK1
EGFR
LINC00525
CDCA5
IGFBP3
SSC4D
MDH2
CCT6A
PSPH
ZAN
ZC3HAV1L
EPHA1
NCAPG2
SYTL5
CHST7
ZNF711
HTR2C
IGSF1
ARHGAP36
MAGEA4
STAR
ST18
RGS20
GINS4
LRP12
NDUFB9
FAM83A
GSDMC
NAPRT
CDKN2A
SIGMAR1
NTRK2
ASTN2
POLE3
PTGES2
PTGES
CACNA1B
PDSS1
PARD3
CDHR1
HTR7
VAX1
MKI67
INA
MTG1
ADAM12
ADM
SLC5A12
ZNF215
SSRP1
SESN3
TENM4
PAK1
DRD2
HTR3B
SLX4IP
ST14
TKFC
INCENP
PLCH2
CCDC15
CHEK1
C20orf144
SPATA25
DSN1
SOGA1
LSM14B
CABLES2
TBX6
ALDOA
TLCD3B
HMGA2
MMP3
CNTN5
CDH8
LYPD1
LYPD6B
CCT5
TIMM8B
PTS
ABCB9
TKTL2
PRSS53
SLC7A11
GPR158
BTBD11
DLG5
MAT1A
TWF1
TEX30
MSGN1
ADAMTS12
NCAPD3
AKR1C6P
AKR1C2
DPYSL4
CENPU
SLC35F4
PABPC3
CENPJ
TMEM267
BEND6
MCHR2
POU4F1
SPC25
PDK1
SPOCK1
BOLL
SUV39H2
DMP1
CCNO
ANKRD22
GRM1
PART1
PLOD2
NRSN1
ZIC1
CENPH
CDYL
ANAPC1
CLGN
MERTK
PLA2R1
ADGRF4
PLEKHG4B
TMPRSS11D
CEBPG
KCTD15
CLCA3P
MSI2
CACNA2D1
HS3ST3A1
CABYR
C16orf74
JPH3
OTULIN
CDH12
CERS3
UCHL1
TDH
TRIM11
C10orf90
DIPK1A
ATP5MC3
MAGED4
SRSF12
CHODL
TMPRSS15
SKA1
RAB6B
EME1
EPHB1
FBXL18
CNTNAP5
PROM2
GOLGA7B
GPR78
PPM1J
SLC16A1
NIFK
NUP205
PDIA4
C2CD6
TMEM237
FZD7
SLC24A2
PXYLP1
RAET1L
GRIP1
KIF5A
MAGEA8
ALX3
CXCL13
SORCS3
ATP5MPL
FUT6
SH3RF2
MTERF3
PTDSS1
FBXO43
TYSND1
PHF6
CD109
LRFN2
GLYATL2
BAG4
TBC1D31
NTAQ1
ATAD2
FBXO32
FRRS1
SASS6
ZIC3
BUB1B
TMEM171
LRP8
MMP14
CACNA2D3
CCNB2
C9orf43
DGKI
PSMG3
GAREM2
DPYSL5
KRTCAP3
ANKRD61
CFAP251
GRHL3
GALNT14
XDH
ABHD3
RNF207
RHBDL2
AUTS2
H2BC5
CDC25C
H4C8
TSPAN33
FAM86C1P
CPA2
POM121L2
DYNC1I1
PFKFB1
HTR6
PLA2G2F
SLC5A11
MIS18A
GART
DONSON
SV2A
LAD1
TNNI1
HOXB13
ATP5MC1
CIART
IGF2BP1
CBR1
CBR3
TUBBP5
CHAF1B
CLDN14
SIM2
PLA2G4D
HK2
ALDH4A1
TCHH
SPRR2G
PGLYRP3
ISL2
TMEM69
IQCC
ATAD3B
ANKLE1
CCDC58
CILP2
TFF2
WDR4
HSF2BP
G6PD
CSTB
RRP1
FTCD
BRSK1
COX6B2
FLAD1
CHRNB2
RUSC1
GBAP1
FAM189B
PAQR6
PPP1R35
NACC1
LY6K
CPSF4
TONSL
RECQL4
FOXH1
CELF5
YDJC
DVL3
AP2M1
ABCF3
PCYT1A
FBXO27
DMKN
BDH1
FDXR
ZNF385A
FAM171A2
DBF4B
RACGAP1
SYCE2
SPC24
FGF11
SNRNP25
SSTR5
SPSB3
MEIOB
TEDC2
CCNF
NTN3
PAQR4
ZG16B
GNG3
FGF19
COA7
ACOT11
FAM151A
PARS2
LEXM
KLHL21
AK4
AKR7A3
LRRC38
KIAA1522
WNT4
LHX8
SLAMF9
KCNJ9
VANGL2
C1orf74
FLVCR1
AXDND1
TDRD5
KIF26B
TFB2M
B3GALNT2
C1orf147
TRIM17
LRATD1
CCDC138
FBXO41
WDCP
SMC6
VSNL1
SLC16A14
EN1
LYSMD1
BOLA3
S100A11
LCE3D
IVL
SPRR3
SPRR2D
PGLYRP4
S100A9
TGFA
NPPC
NIPAL1
DAPL1
CLDN1
LENEP
DCST2
DCST1
INAVA
LINC01116
TAFA4
NAXE
LRRC58
PDCL2
TMEM183A
KRTCAP2
TSACC
CCT3
TMEM79
CRYBA2
CIP2A
DPPA2
SGO2
SERPINI1
IFI16
AIM2
EIF5A2
RPL22L1
GTPBP8
NKX6-1
ERICH6
GMPS
CFAP20DC
U2SURP
PLSCR2
TOPBP1
SPDYA
KIF15
TGM4
WDR43
CDCP1
RTP3
NMNAT3
YEATS2
POLR2H
CAMK2N2
TMEM41A
SENP2
IGF2BP2-AS1
RFC4
RPL39L
SLC51A
UBXN7
RNF168
PIGX
MELTF
METAP1
H2AZ1
CDC25A
FBXW12
CCDC51
HSPA4L
POC1A
PITX2
HMGB2
MAD2L1
ITGA2
F2RL2
F2RL1
CAGE1
TERT
FOXQ1
ADGRF2
GDF9
GJB7
GRIK2
FABP7
SFXN1
IL22RA2
IL31RA
TBX20
PTTG1
FBXL21P
RELL2
SLC29A4
STEAP1
CDCA7L
SP8
FABP5
SLC35G3
SUN3
HNF4G
EN2
KCNV1
ORC5
DNAAF5
DEFB1
TMEM184A
MICALL2
FOXK1
YWHAZ
FZD6
CTHRC1
SLC25A32
DCAF13
INTS8
DIRAS2
ZMAT4
TMC1
PGAP4
SHOC1
RNF183
PCDH19
STRBP
WNK2
ZNF367
STOML2
MELK
SLC7A3
TSHR
PGM2L1
PHYHIPL
SLC16A9
GJB2
SKA3
DDIAS
RPL10L
LRR1
TMEM63C
NGB
CDX2
AKR1E2
OTX2
OXGR1
VDAC2
SOHLH1
COMTD1
HPRT1
ZMYND19
SLC39A2
RNASE7
CYP2C19
C10orf82
ANKRD2
E2F7
LARGE2
PACSIN3
SMCO2
[truncated: 1,156 more rows]

## Sheet: Lung cancer downregulated
FGR
ENPP4
CFTR
CFLAR
TFPI
SLC7A2
PLXND1
HSPB6
PDK4
ZMYND10
ST7
SLC4A1
THSD7A
ACSM3
PON1
ITGAL
ITGA3
ITGA2B
ASB4
ABCC8
CX3CL1
ETV1
ALDH3B1
TBXA2R
ARHGAP44
CEACAM21
DNAH9
SLC13A2
GAS7
CACNA2D2
SELE
CDKL5
PGLYRP1
NFIX
MMP25
IL32
RHOBTB2
IYD
STARD3NL
HHATL
SEMA3G
SLC6A13
CD4
BTK
FYN
ANOS1
DCN
TYROBP
CD22
SEMA3B
NR1H4
ALOX5
CALCOCO1
CLDN11
MVP
GPRC5A
WAS
CHDH
SLC11A1
ATP1A2
VSIG2
PHLDB1
MARCO
CD74
HGF
ADGRA2
SAMD4A
PLEKHB1
C8B
FHL1
BIRC3
EHD2
HSD17B6
VIM
FAS
AGPAT4
BTN3A1
TNFRSF1B
MUSK
GRN
ARHGAP31
PNPLA6
GAB2
MAP2K3
MYOC
DAPK2
TIMP2
MYOM2
OTC
FLT4
TLL1
MSR1
DNAH5
RIPOR1
C6
LCP2
ADRB1
GUCA2B
GPM6B
PREX2
ARAP2
ANO2
WWC3
ARHGAP6
MAP4
ROS1
CC2D2A
LMO3
CELF2
ELN
SLC4A8
LAMC3
FNIP2
MSMO1
KCNQ1
GALC
CYFIP2
CCDC85A
IL17RB
RASGRF1
TBXAS1
SLC2A3
CREB3L3
PRDM6
LTK
SLC6A16
LIMCH1
SPA17
TSPAN32
CCN5
CDON
FAR2
POU1F1
CHI3L2
CALCRL
SLC9A3R2
GLP2R
ANKRD44
MYLK
PRKCQ
TLE2
FAM107B
PDE4A
TIE1
ZMYND12
SPI1
CLDN18
ACSM2B
MYO9A
SP100
KLF6
EVI5
PRKCZ
NAV3
HYAL2
RASSF1
ACSL4
REEP1
ATP11A
RASGRP2
PYGM
ADGRF5
KCNAB2
ABCC9
MAOB
TGFBR3
PLA2G10
RAB27A
FGF10
FSTL3
FRMPD1
NDST1
PTPN21
CAMK2A
MGAT4A
RPS6KA2
VASH1
LMCD1
CYBRD1
CDH19
LIMS2
TRHDE
STK10
EVC
IRAG1
CLCN4
FERMT2
CD5L
TBX21
FRY
ATP2A3
MGLL
NTN4
SCARF1
TXK
CACNG4
RBMS2
RGS11
SLC46A1
ACACB
PAG1
MCAM
RAP1GAP
PPP1R12B
IL4R
APBB1IP
ACTN2
JADE1
FBLN1
ITGA8
CST7
LAMP3
NEBL
EDN1
ADCYAP1R1
ITM2A
RUNX1T1
TNS1
RAPGEF3
PGM1
EPB41L2
STX7
SCTR
SLC4A4
SESN1
CPB2
KCNN2
MAGI3
CXCL2
COL4A4
MEF2C
PTPRC
CACNA1S
LRP2
DELE1
CADPS2
PCDHGA2
PGR
EPB41L3
APLP2
EFR3B
CD59
FCN1
PILRA
ABCB1
TTC39A
EPDR1
SNX10
CEACAM6
LAT2
PPP1R15A
HSD17B14
ACHE
CETP
PHACTR3
CASS4
AAMDC
RFX2
GP6
REM1
DOCK9
C3orf18
KIF9
CRLS1
SIGLEC1
F11
TESC
P2RX7
CFAP61
TBX5
LTBP4
ICAM1
IRAK3
LYZ
PITPNM2
NLRC4
IL5RA
ABCC6
RAPGEF4
APOH
ESR1
CMA1
JPH4
CAPN3
TEKT2
UNC13D
DPYSL2
TGFB2
ADA2
SEC22C
FMO2
SH2D3C
TDRD1
SORBS1
CRTAC1
CRISP3
PGC
IL12RB1
SYDE2
NRP1
PALMD
OCEL1
IGFALS
MISP
GADD45B
SERPIND1
SUSD2
SEC14L3
UPB1
YPEL1
GGT1
MFNG
GGTLC2
TTC28
SLC5A4
TIMP3
CBX7
PDGFB
ACR
GRAP2
NCF4
CSF2RB
MLC1
CTSG
GZMH
CDKL1
CGRRF1
LRRC74A
RIN3
GALNT16
SLC8A3
NFKBIA
NFATC2
TUBB1
SLCO4A1
RASSF2
ANGPT4
RSPO4
SIRPB1
CCM2L
MYL9
SAMHD1
PXMP4
PPP1R16B
LPIN2
MYOM1
SMAD7
RNF125
STS
TLR8
CHRDL1
SRPX
SYP
BMX
ZC3H12B
RS1
GATA1
CD99L2
CD40LG
ZDHHC15
FGF14
CAB39L
ACP5
FGF9
SGCG
FLT1
RGCC
DHRS12
TSC22D1
MSLN
MGRN1
PLLP
ZNF423
CCL17
SMPD3
WFDC1
COTL1
CRISPLD2
LMF1
FOXF1
ZP2
MEFV
CRYM
AQP8
TMC5
AQP9
CORO2B
RASL12
CTSH
ZNF106
FAM189A1
TJP1
RP1
CPQ
NCALD
ASAH1
FCGRT
CD37
LYL1
RETN
CLEC4M
TLE6
NOVA2
LILRA1
IL27RA
SYDE1
PRX
TJP3
DENND3
CEACAM4
NKG7
ICAM5
CD33
CCDC114
CARD8
SIGLEC6
PLA2G4C
SIGLEC5
CABP5
HAS1
RASIP1
LILRB5
ARRDC2
PDE4C
MAG
HPN
RUNDC3B
RASA4
PIK3CG
PON3
CAV2
CAV1
WNT2
HOXA2
HOXA5
VIPR2
TSPAN12
CPED1
COBL
NOD1
MINDY4
PPP1R17
MEOX2
TSPAN13
RARRES2
GIMAP2
SPATA6L
SLC1A1
TMEM245
PRUNE2
C5
OGN
ECM2
AMBP
AKNA
ENG
AK1
DOCK8
MPDZ
PIP5K1B
GLIS3
NPDC1
SH3GL2
PTGDS
RAB11FIP2
CXCL12
CUBN
PALD1
VSIR
SPOCK2
ACTA2
SFXN3
CPEB3
MAP3K8
CSF3
ASPA
SEPTIN4
P2RX1
SLC6A4
ICAM2
CCL2
DHX58
HSD17B1P1
ABI3
SGCA
VAT1
CACNG1
HLF
SLC16A6
PRKAR1A
FAM20A
WSB1
MYH1
VTN
PMP22
ODAM
GAB1
WFS1
SOD3
SH3D19
BST1
RAPGEF2
SNX25
LRP2BP
FAM149A
PPARGC1A
ZBTB16
CRTAM
JHY
P2RX3
VWA5A
SIAE
LPXN
DTX4
EHD1
MS4A4A
FOLR1
FOLR3
ARHGEF17
CEP126
GALNT18
SLC1A2
SLC15A3
CD81
C11orf21
ELMOD1
PTPN5
VWF
CD69
SELPLG
DAO
BIN2
LIN7A
ACSS3
TNS2
LTA4H
SLC6A12
PRMT8
SH2B3
ALDH2
ART4
MGP
ARHGDIB
SPRING1
STX2
ADGRD1
KLRB1
BTN3A3
RSPH4A
MAK
NEDD9
CEP85L
ADTRP
FAM184A
MAN1A1
SERINC1
NCOA7
RIPOR2
SASH1
SLC26A8
SOD2
PHACTR1
CD83
GLP1R
BMP5
FHL5
KHDRBS2
EYA4
SOBP
ARFGEF3
ADGRG6
PHACTR2
QKI
CCND3
LAMA4
TENT5A
CLIC5
ENPP5
LY86
PCDHB2
SEMA5A
C7
NME5
HBEGF
CERT1
HAND1
PDE8B
PCDHB15
BTNL8
CDH6
ARRDC3
SLC27A6
PDE4D
PCDH12
FGF1
NR3C1
LIFR
WWC1
ERGIC1
PDGFRB
CPEB4
AMOTL2
RBP2
KAT2B
LRRC31
GNAI2
HYAL1
IFT57
HHLA2
FRMD4B
EFCC1
PLSCR4
CISH
ARHGEF26
PLCH1
VIPR1
ZBTB47
TNNC1
FOXP1
EPB41L5
ITGB6
SPTBN1
TACR1
ACADL
EVA1A
EFEMP1
FN1
GLS
DNAH6
PECR
EFHD1
ST3GAL5
IL1R1
IL1RL1
IL18R1
IL18RAP
MLPH
ID2
HPCAL1
RMDN2
PLCL1
TRAK2
PCYOX1
EPAS1
PARD3B
TNR
TPSG1
ANGPTL1
QSOX1
ERRFI1
RAP1A
RHOU
ARHGEF2
LEPR
PRG4
NCF2
RGS2
OLFML3
NR5A2
OSCP1
HPCAL4
KMO
AKT3
ST6GALNAC5
ADGRL2
GBP3
KIF17
CD160
ID3
CCDC181
TMED5
CNN3
PLPPR4
MAN1C1
PROX1
STX12
MTARC2
SLC5A9
CTSD
TREH
APOA1
C1orf54
CFAP94
FILIP1
CNR1
SGIP1
PLAGL1
TNFAIP3
CCN2
TCF21
CASQ2
ABCG2
PCDH17
DNAH7
KLF9
ECRG4
CCDC92
C1orf198
CTNNAL1
SLC46A2
HSDL2
NR4A3
GALNT12
CSF3R
NPC2
DNAL1
LTBP2
FLVCR2
ZC2HC1C
CNRIP1
PPP1R3C
CFAP58
SFRP5
HOXB5
DUSP1
TEK
CCDC170
MYCT1
CYSTM1
ARAP3
TTLL2
KCNJ5
IQSEC3
DNAJC15
SMAD9
EGR1
SOCS2
CLU
SORBS3
CHRNA2
ADRA1A
PDLIM2
TBX2
TBX4
TEX14
ADCY7
KCNJ8
PDZRN3
CRY2
CAT
FABP3
CCRL2
UBL3
XPNPEP2
SASH3
CD244
LDB3
PTGFR
KIAA0087
RAMP3
GLIPR2
RECK
SFTPA1
SRGN
HVCN1
RASSF8
ITPR2
NECAB1
ADGRE5
ATP7B
ITIH5
NCKAP1L
MMP19
NR4A1
PDE1B
LRP1
NFE2
BATF3
G0S2
PLA2G12A
C4BPA
C4BPB
MXD4
DAW1
MOGAT1
FAM124B
SLC12A4
SLPI
PREX1
SDC4
PARD6B
TOX2
ZNFX1
EDN3
PTGIS
SNAI1
ATP8A1
HIF3A
CEACAM8
F13A1
SLC17A3
SERPINB6
MOCS1
APOBEC2
GNMT
TREM1
COL21A1
KCNK17
LRRFIP1
RAB17
MYRF
AHNAK
MT2A
DOK4
SLC10A2
KIF25
IRF1
TMEM255A
BMP4
PTGER2
TEKT3
MYH2
C3
TNFSF14
FOSB
FOXA2
CD93
BMP2
FLRT3
PCSK2
LRRN4
TMEM74B
SIRPD
S1PR4
GDF5
MMP24
TMEM53
F10
HCST
THRA
RRAS
STAT5A
GLIS2
CFP
RHOJ
SGPP1
PZP
EVI2A
OMG
AIF1L
FAM78A
AVPR2
ARMCX1
ZC4H2
RGS13
FGD3
MASP1
ATP13A4
PTPRB
PLA2G5
KLF2
F2RL3
MACF1
TNFRSF19
GNG11
HIP1
STEAP4
SGCE
ZFP36
KDR
GAL3ST1
MGAT3
RFPL3
APOL3
LIF
DOCK4
CDHR3
PODXL
FLNC
MYO1B
HOXD1
WDFY4
MYO5C
CGNL1
TMOD2
DLL4
ALDH1A2
ACKR4
CD68
ATP1B2
KIF1C
LRRC6
SIGLEC9
ADCY4
RNASE1
EPB41L4A
CDO1
REEP5
SEC14L1
ARHGEF6
ART1
CDKN1C
PLPPR3
KCNA5
STARD8
LDLR
CNN1
LRCH2
DPP6
USHBP1
AFDN
STK33
GDF15
IQCN
JUND
HRC
ZBTB46
CYP2G1P
PNPLA7
GATA5
GMFG
SMPDL3B
THEMIS2
MPP1
ZNF331
PRRG1
RGN
AKAP12
SYNE1
LILRB2
TTLL9
COX4I2
EDA2R
HIGD1B
SH3BGRL
NFATC1
ADGRE3
SH3BP5
RFTN1
GALNT15
NAPSA
LRRC4B
AOC3
RAMP2
TMEM204
CKMT2
RARA
PPP1R1B
FMO5
RAI2
NR0B2
MATN3
SPATA6
PPARG
EMILIN2
CNGA4
TRIM22
PTPRE
INPP5K
DDC
ENAM
KDM6B
RGS22
HSPA12B
SSTR4
NES
SYT11
VSTM2L
BHMT2
ZBED3
KANK4
SYT4
ATP8A2
ALOX5AP
WASF3
MYH10
MPRIP
RXFP2
KL
STARD13
PRAM1
LGALS12
PLAAT4
PDZD2
GGT2
SEC14L4
GIMAP6
GIMAP4
SFTPD
CA1
LYVE1
MICAL2
HSD17B4
RNF122
DUSP26
COX16
PEBP4
CNTN6
TSPAN2
GSTM5
CHIA
SORT1
CD101
IL6ST
CRB1
CABLES1
DOCK2
EMP1
KLRD1
SPX
SLC43A3
APLNR
C5AR2
ADAMTS8
ETS1
KLB
CTSL
CEMIP2
AGTPBP1
FAM189A2
CCNJL
TBX3
OASL
TMEM243
CD36
ADGRB3
LCA5
LMO2
AMHR2
ITGA7
TESPA1
KRT87P
KRT7
MICAL1
STX11
TEC
DYSF
KCNMB4
CPM
KIAA0513
FHOD1
CAPN9
SLC19A3
CYP27A1
ARMC9
STAB2
USP44
DRAM1
SLC41A2
THSD1
LMO7
SCEL
EDNRB
LCP1
TNS3
RAPGEF5
IL6
NACAD
MYO1G
NKX2-1
ALPK3
TM6SF1
CALCOCO2
GALNT5
SCN7A
HLX
GYPC
KLF4
ST6GALNAC4
TMOD1
STXBP1
SLC31A2
TLR4
KIF12
GABBR2
HEMGN
ENPP2
IL33
IL11RA
TLN1
CCL21
SPAG8
DENND4C
GMPR
RNF144B
TLR2
MGARP
ARRB1
SLCO2B1
LRRC32
TTPA
SDCBP
TRPC6
RDX
FXYD6
ARHGAP20
CASP5
THBS1
PAQR5
UACA
SMAD6
PLCB2
DUOX1
GCOM1
TTLL7
GIPC2
ARHGAP29
DNASE2B
CH25H
CALHM2
PLCE1
RBP4
PLA2G12B
OIT3
AOX1
CDK15
HECW2
SLC40A1
CCDC54
SECISBP2L
APH1B
PRKG2
RASGEF1B
FGF2
KIAA1109
MMRN1
PDE5A
PRDM5
TRPC3
CDKL2
SHROOM3
ANXA3
ENPEP
SLC39A8
RGS3
PARVG
ERP27
FGD4
SLCO1C1
KLRG1
PTPRQ
DUSP6
SLC46A3
LNX2
CCDC65
DHH
ACVRL1
N4BP2L1
RHOF
SLAIN1
MBNL2
RAB20
SSTR1
FITM1
RTN1
GPR65
JDP2
AK7
SLC24A4
FBLN5
FGF7
HDC
CYP1A1
CYP1A2
NTRK3
SH3GL3
SLC5A2
ITGAX
TGFB1I1
MYLK3
ABCC12
NKD1
KIFC3
CMTM2
IRF8
MYOCD
UNC45B
LRRC46
ABCA8
ADCYAP1
GATA6
SLC14A1
ARRB2
ZMYND15
ASGR1
PIK3R5
CCDC40
SECTM1
MAPK4
PNMT
EMP3
WTIP
MYO1F
NLRP12
FBN3
MMEL1
CFAP74
PRDM16
FHAD1
FCN3
CCN1
CYP4B1
SYPL2
SLC44A3
KCNA10
C1orf162
CD53
ITGA10
GPA33
RXRG
ILDR2
DPT
FCGR2A
RGS16
HMCN1
RGL1
LHX9
RORC
CGN
ADAMTSL4
MCL1
SELENBP1
DYRK3
SLC27A3
KCNN3
LEFTY2
REN
PLEKHA6
OSR1
RHOB
NPHP1
MALL
AFF3
GPR17
SCN1A
ZNF385B
CPO
NBEAL1
NYAP2
CPNE9
CNTN4
RBMS3
GADL1
ACKR2
GASK1A
CSRNP1
ITGA9
CTDSPL
STAC
IQSEC1
PTPRG
ARL6IP5
LIMD1
ZNF660
NFKBIZ
COL8A1
MYH15
PLA1A
ADPRH
TMEM108
AGTR1
SLIT2
CORIN
PLAC8
ANK2
USP53
CYP4V2
OTULINL
IQGAP2
PAM
RNF145
C1QTNF2
KCNMB1
DCDC2
DAAM2
HMGCLL1
FGD2
TCTE1
PRSS35
PNRC1
RSPO3
ARHGAP18
VIP
SLC22A3
LINC01558
TMEM140
DENND2A
SH3KBP1
TMEM47
MSN
DIPK2B
RAB41
AWAT2
NXF3
DOCK11
CSGALNACT1
DOK2
TACC1
DNAJC5B
CRH
ADHFE1
SYBU
RSPO2
NFIB
PLIN2
SHC3
SNX30
STOM
SLC25A25
HMCN2
TMEM236
RSU1
ST8SIA6
ZEB1
FAM13C
RGR
LRMDA
ANKRD1
HABP2
CYP17A1
LRRC27
ITPRIP
ZNF214
SERPING1
SLC43A1
CCDC81
NCAM1
GRIK4
GGTLC1
ADAM33
TMC2
MS4A2
ESAM
SCN2B
SIDT2
TAGLN
JPH2
FERMT3
KLRF1
CLEC1A
FXYD4
PCDH15
LATS2
FAM124A
HNMT
GPM6A
WDR17
VEGFC
CCDC102B
DIXDC1
C2orf50
CRIM1
RILPL2
ITPR1
CACNA1C
MAGI1
AL136982.1
AKAP6
MBIP
KCTD14
ME3
NEK7
FER
C4orf33
FRMD4A
QDPR
EDNRA
NR3C2
VENTX
FLI1
WWC2
ZNF385D
GFRA1
TMEM132D
TLCD4
TMEM163
HSPB8
TMEM178A
GRID2
G6PC2
GUCY1A2
OLAH
USP12
TRIM36
PLEKHH2
IGSF10
SPARCL1
GPD1L
CLEC4F
TCTEX1D1
DNAI4
IFIT5
SLC16A12
UTRN
RAB3C
BANK1
TXNDC11
DAB2
ACOXL
BMP6
RASSF3
NR4A2
LPCAT1
C16orf89
FBXL2
JAZF1
PID1
LGI4
DDAH1
GRAP
ANKRD29
DNAAF1
UBASH3B
ROBO4
NRGN
RETREG1
ABI3BP
ANGPT1
CYP4Z2P
PRKCA
CEP112
ABCA9
ABCA6
ABCA10
DISP1
FAM167A
PGM5
CCDC173
PDLIM3
SORBS2
NCAM2
PDE1C
JAM2
ADAMTS1
WNT7A
FGD5
PLCL2
PIEZO2
DKK2
CYP2U1
KLF10
PTPRN2
SAMSN1
SLC7A7
GRIA1
XAGE2
TTN
VSIG4
PDZD9
ELMO1
SLA
CLIC2
MICU3
GNA14
GNAQ
WIF1
UGT2B4
CFAP161
ADAMTSL3
MAP3K7CL
RPGR
FGF18
PCDH1
HKDC1
RAB11FIP1
ADGRG4
LHFPL4
B3GNT7
NMNAT2
FCHO2
RBPMS
C8A
ST3GAL2
IL34
CACNA1D
ARSL
KIT
AFAP1L1
TSC22D3
KCNJ15
ERG
CREB3L1
PALM2AKAP2
SNX22
SLC34A2
CIB4
MEGF11
RADIL
NLRP14
HPD
PRXL2C
MRAS
ESYT3
TENT5B
COLEC12
SHROOM4
CATIP
KCNB1
NRG2
AHCYL2
CD1C
CD1E
NCF1
PPP1R9A
GDPD5
ALAS2
PKD1L1
ITLN2
VWA5B1
ADAMTS4
FCER1G
CSRP1
C1QC
RCAN1
SCUBE1
PADI4
M1AP
BTG2
STARD9
DRC7
ACE
LRRC36
TPPP3
AGRP
C16orf86
ZYX
PTGIR
CPAMD8
TMPRSS3
GAB3
SLC2A6
HIPK4
ST6GALNAC6
JAML
IL6R
PTH1R
MYL3
LRRC71
AZGP1
FGFR4
CYP3A7
HK3
IER2
SCGB3A1
COX7A1
CYGB
KASH5
SIGLEC11
SIGLEC16
CD300LG
TAMALIN
IP6K3
CXCL16
SCIMP
BCL6B
ASGR2
TNFSF13
CCDC42
TBC1D24
ADCY9
SHANK2
PPP1R32
ASRGL1
ITIH3
CYP4A22
TAL1
SLC1A7
PLPP3
SLC45A1
LAPTM5
SYNC
UBXN10
CAMK2N1
ALPL
DIRAS3
NEXN
ADGRL4
B3GALT2
NTNG1
DNAI3
GBP4
BRINP3
KCNT2
CADM3
NLRP3
TRIM58
DDR2
FCGR3B
ATF3
SNED1
C1orf115
PM20D1
PKDCC
PIGR
ACTG2
SPATA18
NOSTRIN
CFAP221
HPGDS
CTSS
C1QTNF7
TNFAIP8L2
ARHGAP25
TDRD10
FZD5
ALPP
ALPG
ANTXR2
LMOD3
IGFN1
EIF4E3
PROK2
LMOD1
CXCR1
ADORA1
CCDC141
IHH
TGFBR2
MNDA
EFHB
CADPS
C3orf49
PRICKLE2
ADAMTS9
PPM1K
TIPARP
PTX3
DNASE1L3
RBM47
APBB2
IL17RE
PCOLCE2
CXCL3
CXCL5
PPBP
PF4
CPA3
TM4SF18
SNRK
CLEC3B
SLC6A20
FYCO1
CCR1
LRRC2
DNALI1
KLF15
LIPH
HEYL
ARHGEF3
SGMS2
EMCN
BDH2
CAMP
SPRY1
PPM1M
ANXA5
GUCY1A1
HPGD
ASB5
NPY1R
NPY5R
HHIP
ZNF474
RANBP3L
RNF180
ANKRD33B
SCGB3A2
ENPP6
EBF1
TLR3
KLKB1
SLC35A1
CITED2
CREBRF
SAMD3
PI16
GALNT10
SAP30L
MYOZ3
BMPER
KCNK5
KIF6
ELAPOR2
SYTL3
ZNF704
SHH
TAGAP
SOX17
DLC1
SBSPON
DEFA4
GPR146
GPER1
NOS3
CA3
FREM1
GEM
MAMDC2
C8orf34
RASEF
SSMEM1
SVEP1
FBP1
CYBB
MID1IP1
PTCHD1
ASB11
PIGA
VEGFD
CLDN3
AQP7
OTUD1
FAT3
LRFN5
LRRC18
CFL2
ZCCHC24
PKNOX2
DEPP1
ZNF22-AS1
DRGX
BEND7
VSTM4
SLC18A2
CLEC1B
TMEM52B
GFI1B
DIPK1B
JCAD
ARHGEF40
BTNL9
UBTD1
ARHGAP42
PDZRN4
C1QL3
CACNB2
TCP11L2
JAM3
CMTM5
RAB8B
C16orf78
CYYR1
BORCS7
C2
TMEM100
APBB1
SYNPO2L
ILK
DCHS1
CYB5A
USP54
RIC3
TMEM130
PRTG
MFAP4
PRKCB
CCDC68
CLEC4E
CLEC4D
TK2
IQCD
RRAD
CFAP52
B2M
NNMT
ACSM1
BMERB1
ANPEP
SCNN1G
RBPMS2
GPR182
MYO1A
MS4A6E
MS4A7
MS4A14
EPB42
MS4A15
MAPRE2
SGSM1
GNGT2
TTC16
SAMD14
TMEM92
ACSF2
PRR15L
SNX20
LOXHD1
DPEP2
ACAA2
CA4
TUBA1A
AQP2
GPD1
AXL
LAIR1
KIR3DL1
PPP1R14A
SEMA6B
SLC43A2
RILP
SERPINF2
CD300C
HID1
TMEM88
CYP7A1
ABCA3
ZNF597
BEST1
PLAAT5
TRANK1
TTC21A
BATF2
SCARA5
VASN
ACOX2
FAM107A
CX3CR1
FILIP1L
MFSD2A
CMAHP
KLHL30
SCNN1B
TNXB
LGI3
SFTPC
PHYHIP
CAVIN2
CHRM1
GFRA2
ADAM29
MUCL3
WFDC13
AXIN2
VWA3B
LDLRAD4
SLC16A4
IL7R
PKIG
NPNT
ATOH8
SFTPB
VAMP5
BTNL3
PLA2G4F
ZNF608
STXBP6
PXDC1
SIGLEC7
SLC49A3
COL4A3
AR
PARM1
ARMC4
GSG1L
IL13
RSPO1
GCSAML
ADRB2
KCNAB1
SHE
STK32A
P2RY12
PTAFR
NPR1
CD52
MUC15
ZEB2
GJB1
CLIC3
GP9
MT1E
LDB2
TAPT1
BTD
CTNND2
AHSP
REPS2
ITGAM
TM4SF4
ZFPM2
MYO7B
MYRIP
SIK2
SLC16A5
ADRA1B
FAXDC2
SLN
CMTM8
FABP4
FOS
CST5
SEMA3E
DCLK2
DNAJC18
LONRF2
HSD17B13
IRX1
IRX2
SGCD
RASA4B
TTLL6
RBMXL2
AKAP13
SDR16C5
FSHR
PLA2G1B
OSCAR
PAQR8
NCBP2L
CEACAM3
HAS2
S1PR1
FPR2
FPR1
SOX7
SIGLEC17P
GIMAP8
PRKCE
JUNB
LRG1
KCNK3
TPPP
APLN
PDE7B
GLOD5
DSEL
HOPX
MROH2B
OR1L8
RXFP1
PTGER4
MAP6
FGG
FGA
NMUR1
PTCRA
ANO5
VAT1L
LGALS4
RASGRP4
KNDC1
CFAP46
ZNF540
ANGPTL7
NINJ2
C3AR1
KLF17
AQP4
SRGAP2C
DRC3
JMJD1C
SYNPO
MAL
LAMB2
FRMD3
SNTB1
ID4
AZU1
TPSAB1
NEGR1
MACROD2
SPTLC3
CLEC12A
CSDC2
RCAN2
IL16
PDZD3
ARNT2
MYOZ2
SYNPO2
IL17D
RAB40A
MAB21L4
CARNS1
CTSW
PDE3A
RND1
EFEMP2
SLFN11
TMEM217
COL6A5
EFCAB12
RAB37
EGFL7
MRGPRF
HPSE2
CCDC96
BNC2
LRRN3
CYSLTR1
ABLIM3
GLRX
ZNF483
MMRN2
TRIB1
C1QB
C1QA
NDNF
OLR1
AGR3
PTPRM
PEAK1
TNFRSF10D
TNFRSF10C
CCR9
SULT1B1
SCAI
SLC19A1
HSPB7
SUSD5
[truncated: 653 more rows]

## Sheet: pancreatic cancer upregulated
PPP2R2C
ALDH3A1
MUC5B
SPDEF
FIBCD1
FGFBP1
ABCA12
HAPLN1
ALPP
ALPG
PPP1R14D
A2ML1
PSCA
LY6D
MUCL3
FABP6
DMBT1
KRT6A
CASC9
LINC00589
LINC02320
LINC01833
TPSP2
AC093904.4
KLK5
TUBAL3
LINC02783
SLCO1B3
HOXD10
AFAP1-AS1
RN7SL238P
BX005040.3

## Sheet: pancreatic cancer downregulated
GDF7
IL34
SNX22
SCN11A
LINC00173
EEF1A1P24
GLYCTK-AS1
AC004687.1
LINC02541
